# Supplementary material for: MicroRNA-122 supports robust innate immunity in hepatocytes by targeting the RTKs/STAT3 signaling pathway
Source: eLife journal article supplement (doi:10.7554/elife.41159), 2019-02-08
Supplement: supp [file elife-41159-supp-v1.zip]

## Figure 7-figure supplement 1

|                                                                                                                                                         |                                                                                                                                     |
|---------------------------------------------------------------------------------------------------------------------------------------------------------|-------------------------------------------------------------------------------------------------------------------------------------|
| <b>Human IGF1R site 1</b><br>5' GACACGCGGCGACACACUCCG 3' UTR:697-703<br>  : ::               <br>3' GUUUGUGGUAACAGUGAGGU miR-122                        | <b>Human IGF1R site 2</b><br>5' CUCUCCCCUUUCUGCUACAUCCA 3' UTR:1346-1352<br>                   <br>3' GUUUGUGGUAACA-GUGAGGU miR-122 |
| <b>Human PKM2</b><br>5' CUGUCCUGCAGCAAACACUCCA 3' UTR:520-527<br>               <br>3' GUUUGUGGUAACAGUGAGGU miR-122                                     | <b>Human MAP3K3 site</b><br>5' CAACAAACCCUGACAUCCA 3' UTR:2042-2048<br>               <br>3' GUUUGUGGUAACAGUGAGGU miR-122           |
| <b>Human IL1RN site</b><br>5' CAAGCUCCAUCUC--CACUCCAG 3' UTR:763-769<br>               <br>3' GUUUGUGGUAACAGUGAGGU miR-122                              |                                                                                                                                     |
| <b>Human MERTK site 1</b><br>5' ACUCUAAUUAUUGCCUCCUGCACUCCC CDS:2717-2723<br>: :              :               <br>3' GUUUGUGGUAAC--AG--UGUGAGGU miR-122 | <b>Human MERTK site 2</b><br>5' AGAGGUGCGGGGAGACAUUCCA 3' UTR:17-23<br>      :     <br>3' GUUUGUGGUAACAGUGAGGU miR-122              |
| <b>Human FGFR1 site 1</b><br>5' AUUGCGCCAUUG---CACUCCA 3' UTR:1522-1528<br>                   <br>3' GUUUGUGGUAACAGUGAGGU miR-122                       | <b>Human FGFR1 site 2</b><br>5' CAUGGCUCAAACUACACAUCCU 3' UTR:1952-1958<br>               <br>3' GUUUGUGGUAACAGUGAGGU miR-122       |
| <b>Human IGF2 site1</b><br>5' AUAAGGAAUU-UGGCACUCCC 3' UTR:491-497<br>    :         :               <br>3' GUUUGUGGUAACAGUGAGGU miR-122                 | <b>Human IGF2 site2</b><br>5' CCCAGACUGGCUCUCCACACUCCC 3' UTR:692-698<br>               <br>3' GUUUGUGGUAACAGUGAGGU miR-122         |
| <b>Human FGF11 site 1</b><br>5' GGUGAAGGCCUCUUGACAUCCAG 3' UTR:1372-1378<br>               <br>3' GUUUGUGGUAACAGUGAGGU miR-122                          | <b>Human FGF11 site 2</b><br>5' AGGGGAUCGGGUCUCACAUCCAG 3' UTR:1751-1757<br>               <br>3' GUUUGUGGUAACAGUGAGGU miR-122      |
| <b>Human DSTYK site 1</b><br>5' AUCAUGCCAUG--CACUCCAG 3' UTR:933-939<br>                   <br>3' GUUUGUGGUAACAGUGAGGU miR-122                          | <b>Human DSTYK site 2</b><br>5' AUCACACCACUG--CACUCCAG 3' UTR:4358-4364<br>                   <br>3' GUUUGUGGUAACAGUGAGGU miR-122   |
| <b>Human OSMR site</b><br>5' GCUAUGGAACUUAACACUCCC 3' UTR:170-176<br>               <br>3' GUUUGUGGUAACAGUGAGGU miR-122                                 | <b>Human EPO site</b><br>5' CCUGUCCCAUGG--ACACUCCA 3' UTR:124-131<br>                   <br>3' GUUUGUGGUAACAGUGAGGU miR-122         |
| <b>Human EFNA1 site</b><br>5' GAAGAGAGGGACAGGCACUCCAA 3' UTR:54-60<br>               <br>3' GUUUGUGGUAACAGUGAGGU miR-122                                | <b>Human IL1R1 site</b><br>5' AUAACGGUCCCCCUACAUCCAC 3' UTR:1829-1835<br>               <br>3' GUUUGUGGUAACAGUGAGGU miR-122         |
| <b>Human JAK3 site 1</b><br>5' UCCUGCCUGUGUACACUCCC CDS:202-207<br>               <br>3' GUUUGUGGUAACAGUGAGGU miR-122                                   | <b>Human JAK3 site 2</b><br>5' CCAGAGGGCAAACACACTCCC CDS:3355-3360<br>               <br>3' GUUUGUGGUAACAGUGAGGU miR-122            |
| <b>Human ABL2 site 1</b><br>5' CAGAU CGCGCCACUGACUCCAG 3' UTR:5653-5659<br>               <br>3' GUUUGUGGUAACAGUGAGGU miR-122                           | <b>Human ABL2 site 2</b><br>5' GAGAU CGCGCCCGUGACUCCAG 3' UTR:6288-6294<br>               <br>3' GUUUGUGGUAACAGUGAGGU miR-122       |

**Figure 7-figure supplement 1.** miR-122 binding sites in the 3'UTR or the CDS of candidate genes, predicted by TargetScan or RegRNA. The binding sites of IGF1R (S1 and S2), PKM2 and MAP3K3 have been reported to be functional.
