# Supplementary material for: MicroRNA-122 supports robust innate immunity in hepatocytes by targeting the RTKs/STAT3 signaling pathway
Source: eLife journal article supplement (doi:10.7554/elife.41159), 2019-02-08
Supplement: supp [file elife-41159-supp-v1.zip]

Archive with 52 entries (52 files):
- elife_poa_e41159_Figure_1_source_data_8.xlsx
- elife_poa_e41159_Figure_5_source_data_1.xlsx
- elife_poa_e41159_Figure_5_source_data_4.xlsx
- elife_poa_e41159_Figure_5_source_data_2.xlsx
- elife_poa_e41159_Figure_4_source_data_2.xlsx
- elife_poa_e41159_Figure_7_source_data_3.xlsx
- elife_poa_e41159_Figure_3_source_data_7.xlsx
- elife_poa_e41159_Transparent_Reporting_File.docx
- elife_poa_e41159_Figure_6_source_data_4.xlsx
- elife_poa_e41159_Figure_2_source_data_1.xlsx
- elife_poa_e41159_Supplementary_File_2.docx
- elife_poa_e41159_Figure_2_source_data_4.xlsx
- elife_poa_e41159_Figure_1_source_data_5.xlsx
- elife_poa_e41159_Figure_3_source_data_3.xlsx
- elife_poa_e41159_Figure_7_figure_supplement_1.pdf
- elife_poa_e41159_Figure_5_source_data_5.xlsx
- elife_poa_e41159_Figure_3_source_data_4.xlsx
- elife_poa_e41159_Supplementary_File_1.docx
- elife_poa_e41159_Figure_3_source_data_6.xlsx
- elife_poa_e41159_Figure_3_source_data_8.xlsx
- elife_poa_e41159_Figure_3_figure_supplement_2.pdf
- elife_poa_e41159_Figure_4_source_data_1.xlsx
- elife_poa_e41159_Figure_6_figure_supplement_2.pdf
- elife_poa_e41159_Figure_3_figure_supplement_1.pdf
- elife_poa_e41159_Supplementary_File_4.docx
- elife_poa_e41159_Figure_6_figure_supplement_3.pdf
- elife_poa_e41159_Figure_6_source_data_3.xlsx
- elife_poa_e41159_Figure_5_source_data_3.xlsx
- elife_poa_e41159_Figure_1_source_data_6.xlsx
- elife_poa_e41159_Figure_2_source_data_2.xlsx
- elife_poa_e41159_Figure_1_source_data_3.xlsx
- elife_poa_e41159_Figure_1_source_data_7.xlsx
- elife_poa_e41159_Figure_3_source_data_2.xlsx
- elife_poa_e41159_Figure_5_source_data_7.xlsx
- elife_poa_e41159_Figure_7_figure_supplement_2.pdf
- elife_poa_e41159_Figure_7_source_data_2.xlsx
- elife_poa_e41159_Supplementary_File_3.docx
- elife_poa_e41159_Figure_1_source_data_2.xlsx
- elife_poa_e41159_Figure_1_source_data_4.xlsx
- elife_poa_e41159_Figure_1_source_data_1.xlsx
- elife_poa_e41159_Figure_5_source_data_6.xlsx
- elife_poa_e41159_Figure_3_source_data_9.xlsx
- elife_poa_e41159_Figure_3_source_data_5.xlsx
- elife_poa_e41159_Figure_7_source_data_1.xlsx
- elife_poa_e41159_Figure_6_source_data_2.xlsx
- elife_poa_e41159_Figure_2_figure_supplement_1.pdf
- elife_poa_e41159_Figure_3_source_data_1.xlsx
- elife_poa_e41159_Figure_2_source_data_3.xlsx
- elife_poa_e41159_Figure_1_figure_supplement_1.pdf
- elife_poa_e41159_Figure_5_figure_supplement_1.pdf
- elife_poa_e41159_Figure_6_source_data_1.xlsx
- elife_poa_e41159_Figure_6_figure_supplement_1.pdf
