# Supplementary material for: MicroRNA-122 supports robust innate immunity in hepatocytes by targeting the RTKs/STAT3 signaling pathway
Source: eLife journal article supplement (doi:10.7554/elife.41159), 2019-02-08
Supplement: supp [file elife-41159-supp-v1.zip]

## Figure 6-figure supplement 1

**A**

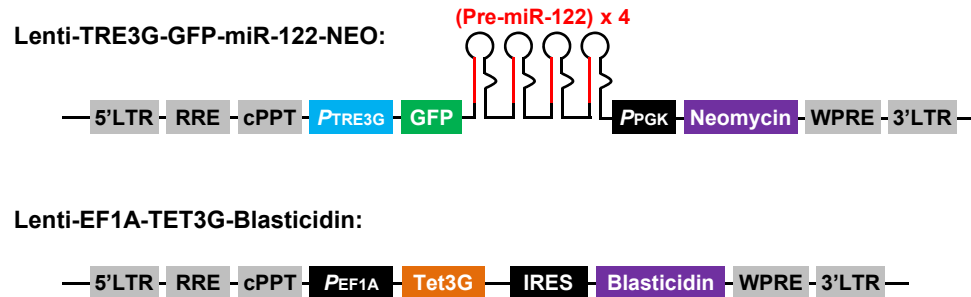

**B**

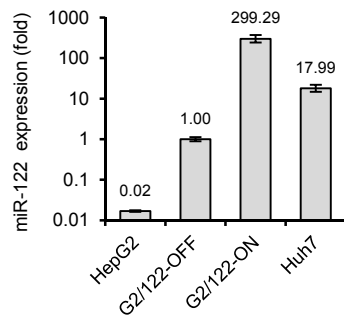

**C**

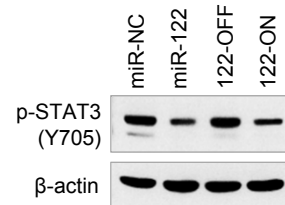

**Figure 6-figure supplement 1.** The miR-122-Tet-On cell line. **(A)** Structure of the two lentiviral transfer vectors used for expression of miR-122 hairpins (upper) and Tet3G trans-activator (lower). **(B)** qRT-PCR analysis of miR-122 levels in HepG2, Huh7, miR-122-Tet-On cells with (G2/122-ON), or without (G2/122-OFF) doxycycline treatment (1000ng/ml, 72 hours). **(C)** Comparing the effect of transient and stable miR-122 over-expression on p-STAT3. qRT-PCR data are one experiment representative of two independent experiments (mean  $\pm$  SEM of technical triplicates).
