# Supplementary material for: MicroRNA-122 supports robust innate immunity in hepatocytes by targeting the RTKs/STAT3 signaling pathway
Source: eLife journal article supplement (doi:10.7554/elife.41159), 2019-02-08
Supplement: supp [file elife-41159-supp-v1.zip › elife_poa_e41159_Figure_1_figure_supplement_1.pdf]

## Figure 1-figure supplement 1

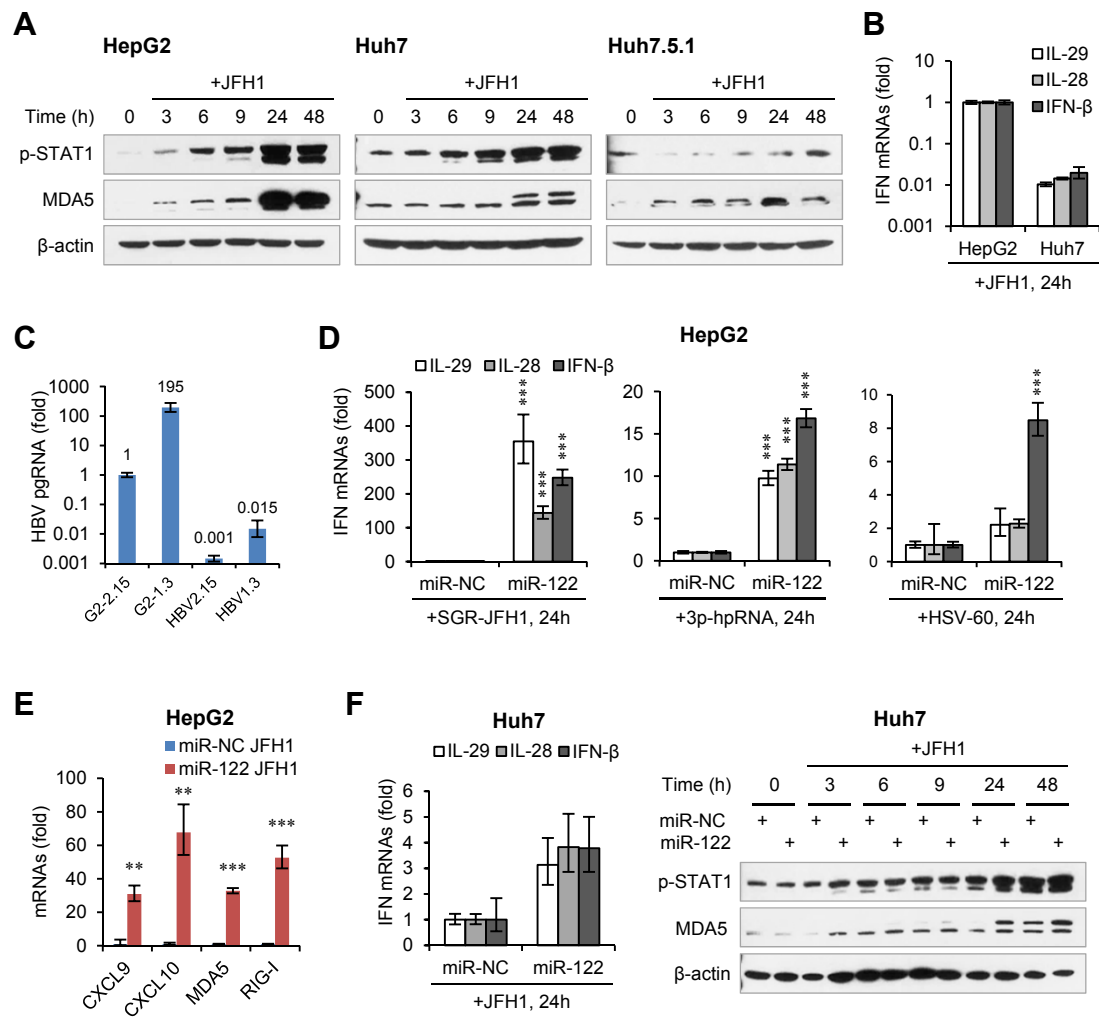

**Figure 1-figure supplement 1.** miR-122 promotes antiviral IFN response. **(A)** Western blot analysis of p-STAT1 and MDA5 in three hepatoma-derived cell lines transfected with JFH1 RNA. **(B)** Comparison of IFN expression in HepG2 and Huh7 cells transfected with JFH1 RNA. **(C)** qRT-PCR analysis of HBV pgRNA levels in HepG2-2.15 (G2-2.15), HepG2 cells transfected with HBV 1.3-mer vector (G2-1.3), HepG2 cells transfected with total RNAs isolated from HepG2-2.15 (HBV2.15) or G2-1.3 (HBV1.3). **(D)** qRT-PCR analysis of IFNs in HepG2 cells first transfected with miR-NC or miR-122 for 2 days, and then treated with indicated nucleic acids for 24 hours. **(E)** qRT-PCR analysis of the indicated genes in HepG2 cells treated with mimics and then JFH1, as in D. **(F)** Analysis of the IFN mRNAs and p-STAT1 in Huh7 cells first transfected with miR-NC or miR-122 mimics and then treated with JFH1. qRT-PCR data are one experiment representative of two (B and C) or three (D-F) independent experiments (mean  $\pm$  SEM). \* $P$  < 0.05, \*\* $P$  < 0.01 and \*\*\* $P$  < 0.001.
