# Supplementary material for: MicroRNA-122 supports robust innate immunity in hepatocytes by targeting the RTKs/STAT3 signaling pathway
Source: eLife journal article supplement (doi:10.7554/elife.41159), 2019-02-08
Supplement: supp [file elife-41159-supp-v1.zip › elife_poa_e41159_Figure_1_source_data_1.xlsx]

## Sheet: Sheet1
Data used for illustration
						upper bar	lower bar
	Sample Name	Target Name	RQmean	RQmax	RQmin	RQmax-RQmean	RQmean-RQmin
	HepG2+JFH1	IFNB	1	1.12329	0.890245	0.123287	0.109755
	HepG2+JFH1	IL-28	1	1.04723	0.954902	0.0472275	0.0450977
	HepG2+JFH1	IL-29	1	1.09337	0.914603	0.0933705	0.0853969
	HUH7+JFH1	IFNB	0.116148	0.126787	0.106402	0.010639	0.00974624
	HUH7+JFH1	IL-28	0.00477667	0.00555575	0.00410685	0.000779074	0.000669826
	HUH7+JFH1	IL-29	0.00868059	0.0101346	0.00743523	0.00145396	0.00124537
Note 1: The expression of IFNs was presented as "fold" relative to the expression of GAPDH and normalized to the indicated group.
Note 2: Data presented are one experiment representative of two independent experiments (mean ± s.e.m. of technical triplicates).
