# Supplementary material for: MicroRNA-122 supports robust innate immunity in hepatocytes by targeting the RTKs/STAT3 signaling pathway
Source: eLife journal article supplement (doi:10.7554/elife.41159), 2019-02-08
Supplement: supp [file elife-41159-supp-v1.zip › elife_poa_e41159_Figure_1_source_data_2.xlsx]

## Sheet: Sheet1
Data used for illustration
						upper bar	lower bar
	Sample Name	Target Name	RQmean	RQmax	RQmin	RQmax-RQmean	RQmean-RQmin
	G2-2.15	pgRNA	1	1.19037	0.840075	0.19037	0.159925
	G2-1.3	pgRNA	195.38	277.901	137.363	82.521	58.0169
	HBV2.15	pgRNA	0.00145863	0.00184436	0.00115357	0.000385731	0.000305059
	HBV1.3	pgRNA	0.0149159	0.0285836	0.00778367	0.0136676	0.00713226
Note 1: The expression of pgRNA was presented as "fold" relative to the expression of GAPDH and normalized to the indicated group.
Note 2: Data presented are one experiment representative of two independent experiments (mean ± s.e.m. of technical triplicates).
