# Supplementary material for: MicroRNA-122 supports robust innate immunity in hepatocytes by targeting the RTKs/STAT3 signaling pathway
Source: eLife journal article supplement (doi:10.7554/elife.41159), 2019-02-08
Supplement: supp [file elife-41159-supp-v1.zip › elife_poa_e41159_Figure_1_source_data_3.xlsx]

## Sheet: Sheet1
Data used for illustration
					upper bar	lower bar							upper bar	lower bar							upper bar	lower bar
Sample Name	Target Name	RQmean	RQmax	RQmin	RQmax-RQmean	RQmean-RQmin		Sample Name	Target Name	RQmean	RQmax	RQmin	RQmax-RQmean	RQmean-RQmin		Sample Name	Target Name	RQmean	RQmax	RQmin	RQmax-RQmean	RQmean-RQmin
mock	IFNB	1	1.14478	0.873529	0.144782	0.126471		mock	IL-28	1	1.63766	0.610628	0.637659	0.389372		mock	IL-29	1	1.27342	0.785289	0.273417	0.214711
JFH1	IFNB	57.4065	61.8456	53.286	4.43913	4.1205		JFH1	IL-28	2850.76	3149.38	2580.45	298.618	270.304		JFH1	IL-29	685.159	728.737	644.186	43.5783	40.9723
SGR-JFH1	IFNB	64.2061	73.5816	56.0252	9.3755	8.18091		1ug SGR	IL-28	6324.61	7206.28	5550.81	881.668	773.799		1ug SGR	IL-29	1419.49	1565.14	1287.4	145.649	132.095
poly(I:C)	IFNB	47.1763	53.8859	41.3022	6.70956	5.87413		poly(I:C)	IL-28	2356.8	2586.88	2147.19	230.075	209.612		poly(I:C)	IL-29	743.009	924.992	596.829	181.983	146.18
3p-hpRNA	IFNB	79.0474	86.5113	72.2274	7.46398	6.82		3p-hpRNA	IL-28	4438.57	4916.69	4006.95	478.114	431.621		3p-hpRNA	IL-29	1523.35	1661.35	1396.82	137.996	126.534
HBV2.15	IFNB	2.16654	2.47455	1.89686	0.308016	0.269676		G2-2.15	IL-28	7.00555	9.69461	5.06238	2.68906	1.94318		G2-2.15	IL-29	3.69569	5.3001	2.57696	1.60441	1.11873
HBV1.3	IFNB	0.953798	1.18056	0.770594	0.226759	0.183203		HBV1.3	IL-28	1.75547	2.34124	1.31626	0.585766	0.43921		HBV1.3	IL-29	1.28439	1.62319	1.0163	0.338804	0.268086
εRNA	IFNB	2.0313	2.44773	1.68572	0.416426	0.345581		HBV εRNA	IL-28	1.60693	3.29997	0.782501	1.69304	0.824431		HBV εRNA	IL-29	1.68163	3.06132	0.923744	1.37969	0.757885
HSV-60	IFNB	8.53256	9.37974	7.7619	0.84718	0.770662		HSV-60	IL-28	2.54479	3.81586	1.69712	1.27107	0.847675		HSV-60	IL-29	5.51124	7.12783	4.2613	1.61659	1.24995
ssRNA40	IFNB	9.02871	10.845	7.51662	1.81627	1.51209		ssRNA40	IL-28	2.77912	3.52716	2.18972	0.748042	0.589396		ssRNA40	IL-29	6.22229	7.81585	4.95364	1.59356	1.26865
Note 1: The expression of IFNs was presented as "fold" relative to the expression of GAPDH and normalized to the indicated group.
Note 2: Data presented are one experiment representative of three independent experiments (mean ± s.e.m. of technical triplicates).
1. For data obtained from the same plate, the RQmeans that automatically generated by the software can be directly used for illustration,
we only need to calculate the error bars (upper bar = RQmax-RQmean, lower bar = RQmean-RQmin).
For example:
Raw data obtained from the QuantStudio(TM) 6 Flex System																	Our calculation
																	upper bar	lower bar
Well Position	Sample Name	Target Name	RQ	RQ Min	RQ Max	CT	Ct Mean	Ct SD	Delta Ct Mean	Delta Ct SE	Delta Delta Ct		Samples	RQ	RQ Min	RQ Max	RQmax-RQmean	RQmean-RQmin
A1	Sample 1	IL-29	1	0.785289	1.27342	28.618	28.5813	0.212902	13.2412	0.125594	0		mock	1	0.785289	1.27342	0.273417	0.214711
A2	Sample 1	IL-29	1	0.785289	1.27342	28.3524	28.5813	0.212902	13.2412	0.125594	0		mock	1	0.785289	1.27342	0.273417	0.214711
A3	Sample 1	IL-29	1	0.785289	1.27342	28.7734	28.5813	0.212902	13.2412	0.125594	0		mock	1	0.785289	1.27342	0.273417	0.214711
A4	Sample 1	IL-28	1	0.610628	1.63766	32.9894	32.5231	0.441693	17.183	0.256311	0		mock	1	0.610628	1.63766	0.637659	0.389372
A5	Sample 1	IL-28	1	0.610628	1.63766	32.4689	32.5231	0.441693	17.183	0.256311	0		mock	1	0.610628	1.63766	0.637659	0.389372
A6	Sample 1	IL-28	1	0.610628	1.63766	32.111	32.5231	0.441693	17.183	0.256311	0		mock	1	0.610628	1.63766	0.637659	0.389372
A7	Sample 1	IFNB	1	0.873529	1.14478	27.5514	27.6691	0.113204	12.329	0.0702599	0		mock	1	0.873529	1.14478	0.144782	0.126471
A8	Sample 1	IFNB	1	0.873529	1.14478	27.7772	27.6691	0.113204	12.329	0.0702599	0		mock	1	0.873529	1.14478	0.144782	0.126471
A9	Sample 1	IFNB	1	0.873529	1.14478	27.6786	27.6691	0.113204	12.329	0.0702599	0		mock	1	0.873529	1.14478	0.144782	0.126471
A10	Sample 1	GAPDH				15.3038	15.3401	0.0446575					mock
A11	Sample 1	GAPDH				15.3265	15.3401	0.0446575					mock
A12	Sample 1	GAPDH				15.39	15.3401	0.0446575					mock
B1	Sample 2	IL-29	685.159	644.186	728.737	19.8935	19.8854	0.00935793	3.82086	0.032041	-9.42029		JFH1	685.159	644.186	728.737	43.5783	40.9724
B2	Sample 2	IL-29	685.159	644.186	728.737	19.8752	19.8854	0.00935793	3.82086	0.032041	-9.42029		JFH1	685.159	644.186	728.737	43.5783	40.9724
B3	Sample 2	IL-29	685.159	644.186	728.737	19.8875	19.8854	0.00935793	3.82086	0.032041	-9.42029		JFH1	685.159	644.186	728.737	43.5783	40.9724
B4	Sample 2	IL-28	2850.76	2580.45	3149.37	21.7392	21.7704	0.0710374	5.70588	0.0517643	-11.4771		JFH1	2850.76	2580.45	3149.37	298.618	270.304
B5	Sample 2	IL-28	2850.76	2580.45	3149.37	21.8517	21.7704	0.0710374	5.70588	0.0517643	-11.4771		JFH1	2850.76	2580.45	3149.37	298.618	270.304
B6	Sample 2	IL-28	2850.76	2580.45	3149.37	21.7204	21.7704	0.0710374	5.70588	0.0517643	-11.4771		JFH1	2850.76	2580.45	3149.37	298.618	270.304
B7	Sample 2	IFNB	57.4065	53.286	61.8456	22.5057	22.5504	0.0387495	6.48587	0.0387033	-5.84314		JFH1	57.4065	53.286	61.8456	4.43913	4.1205
B8	Sample 2	IFNB	57.4065	53.286	61.8456	22.5727	22.5504	0.0387495	6.48587	0.0387033	-5.84314		JFH1	57.4065	53.286	61.8456	4.43913	4.1205
B9	Sample 2	IFNB	57.4065	53.286	61.8456	22.5729	22.5504	0.0387495	6.48587	0.0387033	-5.84314		JFH1	57.4065	53.286	61.8456	4.43913	4.1205
B10	Sample 2	GAPDH				16.0194	16.0646	0.054702					JFH1
B11	Sample 2	GAPDH				16.0489	16.0646	0.054702					JFH1
B12	Sample 2	GAPDH				16.1254	16.0646	0.054702					JFH1
2. For data obtained from different plates, we calculated the relevant values by using the same algorithm as the software.
For example:
Raw data obtained from the QuantStudio(TM) 6 Flex System										Our calculation
													Delta Ct SE * t0.05/2(n=3)	ΔΔCт - t0.05/2, ΔCт SEM	ΔΔCт + t0.05/2, ΔCт SEM	POWER (2, -ΔΔCt)	POWER (2, -upper confidence limit )	POWER (2, -lower confidence limit )
Well Position	Sample Name	Target Name	CT	Ct Mean	Ct SD	Delta Ct Mean	Delta Ct SE		Samples	Normalization	ΔΔCт	t0.05/2(n=3)	t0.05/2, ΔCт SEM	upper confidence limit	lower confidence limit	RQmean	RQmax	RQmin	RQmax-RQmean	RQmean-RQmin
A1	Sample 1	IL-29	28.618	28.5813	0.212902	13.2412	0.125594		mock	13.2412	0	2.77644	0.348705	-0.348705	0.348705	1	1.27342	0.785289	0.273417	0.214711
A2	Sample 1	IL-29	28.3524	28.5813	0.212902	13.2412	0.125594		mock	13.2412	0	2.77644	0.348705	-0.348705	0.348705	1	1.27342	0.785289	0.273417	0.214711
A3	Sample 1	IL-29	28.7734	28.5813	0.212902	13.2412	0.125594		mock	13.2412	0	2.77644	0.348705	-0.348705	0.348705	1	1.27342	0.785289	0.273417	0.214711
A4	Sample 1	IL-28	32.9894	32.5231	0.441693	17.183	0.256311		mock	17.183	0	2.77644	0.711635	-0.711635	0.711635	1	1.63766	0.610628	0.637659	0.389372
A5	Sample 1	IL-28	32.4689	32.5231	0.441693	17.183	0.256311		mock	17.183	0	2.77644	0.711635	-0.711635	0.711635	1	1.63766	0.610628	0.637659	0.389372
A6	Sample 1	IL-28	32.111	32.5231	0.441693	17.183	0.256311		mock	17.183	0	2.77644	0.711635	-0.711635	0.711635	1	1.63766	0.610628	0.637659	0.389372
A7	Sample 1	IFNB	27.5514	27.6691	0.113204	12.329	0.0702599		mock	12.329	0	2.77644	0.195073	-0.195073	0.195073	1	1.14478	0.873529	0.144782	0.126471
A8	Sample 1	IFNB	27.7772	27.6691	0.113204	12.329	0.0702599		mock	12.329	0	2.77644	0.195073	-0.195073	0.195073	1	1.14478	0.873529	0.144782	0.126471
A9	Sample 1	IFNB	27.6786	27.6691	0.113204	12.329	0.0702599		mock	12.329	0	2.77644	0.195073	-0.195073	0.195073	1	1.14478	0.873529	0.144782	0.126471
A10	Sample 1	GAPDH	15.3038	15.3401	0.0446575				mock
A11	Sample 1	GAPDH	15.3265	15.3401	0.0446575				mock
A12	Sample 1	GAPDH	15.39	15.3401	0.0446575				mock
B1	Sample 2	IL-29	19.8935	19.8854	0.00935793	3.82086	0.032041		JFH1	13.2412	-9.42029	2.77644	0.0889601	-9.50925	-9.33133	685.159	728.737	644.186	43.5783	40.9723
B2	Sample 2	IL-29	19.8752	19.8854	0.00935793	3.82086	0.032041		JFH1	13.2412	-9.42029	2.77644	0.0889601	-9.50925	-9.33133	685.159	728.737	644.186	43.5783	40.9723
B3	Sample 2	IL-29	19.8875	19.8854	0.00935793	3.82086	0.032041		JFH1	13.2412	-9.42029	2.77644	0.0889601	-9.50925	-9.33133	685.159	728.737	644.186	43.5783	40.9723
B4	Sample 2	IL-28	21.7392	21.7704	0.0710374	5.70588	0.0517643		JFH1	17.183	-11.4771	2.77644	0.143721	-11.6209	-11.3334	2850.76	3149.38	2580.45	298.618	270.304
B5	Sample 2	IL-28	21.8517	21.7704	0.0710374	5.70588	0.0517643		JFH1	17.183	-11.4771	2.77644	0.143721	-11.6209	-11.3334	2850.76	3149.38	2580.45	298.618	270.304
B6	Sample 2	IL-28	21.7204	21.7704	0.0710374	5.70588	0.0517643		JFH1	17.183	-11.4771	2.77644	0.143721	-11.6209	-11.3334	2850.76	3149.38	2580.45	298.618	270.304
B7	Sample 2	IFNB	22.5057	22.5504	0.0387495	6.48587	0.0387033		JFH1	12.329	-5.84314	2.77644	0.107458	-5.9506	-5.73568	57.4065	61.8456	53.286	4.43913	4.1205
B8	Sample 2	IFNB	22.5727	22.5504	0.0387495	6.48587	0.0387033		JFH1	12.329	-5.84314	2.77644	0.107458	-5.9506	-5.73568	57.4065	61.8456	53.286	4.43913	4.1205
B9	Sample 2	IFNB	22.5729	22.5504	0.0387495	6.48587	0.0387033		JFH1	12.329	-5.84314	2.77644	0.107458	-5.9506	-5.73568	57.4065	61.8456	53.286	4.43913	4.1205
B10	Sample 2	GAPDH	16.0194	16.0646	0.054702				JFH1
B11	Sample 2	GAPDH	16.0489	16.0646	0.054702				JFH1
B12	Sample 2	GAPDH	16.1254	16.0646	0.054702				JFH1
Well Position	Sample Name	Target Name	CT	Ct Mean	Ct SD	Delta Ct Mean	Delta Ct SE		Samples	Normalization	ΔΔCт	t0.05/2(n=3)	t0.05/2, ΔCт SEM	upper confidence limit	lower confidence limit	RQmean	RQmax	RQmin	RQmax-RQmean	RQmean-RQmin
A1	Sample 9	IL-29	18.6343	18.674	0.0428868	2.66812	0.0450595		3p-hpRNA	13.2412	-10.573	2.77644	0.125105	-10.6981	-10.4479	1523.35	1661.35	1396.82	137.996	126.534
A2	Sample 9	IL-29	18.7195	18.674	0.0428868	2.66812	0.0450595		3p-hpRNA	13.2412	-10.573	2.77644	0.125105	-10.6981	-10.4479	1523.35	1661.35	1396.82	137.996	126.534
A3	Sample 9	IL-29	18.6681	18.674	0.0428868	2.66812	0.0450595		3p-hpRNA	13.2412	-10.573	2.77644	0.125105	-10.6981	-10.4479	1523.35	1661.35	1396.82	137.996	126.534
A4	Sample 9	IL-28	21.1355	21.073	0.0650045	5.06713	0.0531581		3p-hpRNA	17.183	-12.1159	2.77644	0.147591	-12.2635	-11.9683	4438.57	4916.69	4006.95	478.114	431.621
A5	Sample 9	IL-28	21.0776	21.073	0.0650045	5.06713	0.0531581		3p-hpRNA	17.183	-12.1159	2.77644	0.147591	-12.2635	-11.9683	4438.57	4916.69	4006.95	478.114	431.621
A6	Sample 9	IL-28	21.0058	21.073	0.0650045	5.06713	0.0531581		3p-hpRNA	17.183	-12.1159	2.77644	0.147591	-12.2635	-11.9683	4438.57	4916.69	4006.95	478.114	431.621
A7	Sample 9	IFNB	22.0858	22.0302	0.0484009	6.02437	0.0468844		3p-hpRNA	12.329	-6.30465	2.77644	0.130172	-6.43482	-6.17447	79.0474	86.5113	72.2274	7.46398	6.82
A8	Sample 9	IFNB	21.9978	22.0302	0.0484009	6.02437	0.0468844		3p-hpRNA	12.329	-6.30465	2.77644	0.130172	-6.43482	-6.17447	79.0474	86.5113	72.2274	7.46398	6.82
A9	Sample 9	IFNB	22.007	22.0302	0.0484009	6.02437	0.0468844		3p-hpRNA	12.329	-6.30465	2.77644	0.130172	-6.43482	-6.17447	79.0474	86.5113	72.2274	7.46398	6.82
A10	Sample 9	GAPDH	15.943	16.0058	0.0652057				3p-hpRNA
A11	Sample 9	GAPDH	16.0013	16.0058	0.0652057				3p-hpRNA
A12	Sample 9	GAPDH	16.0732	16.0058	0.0652057				3p-hpRNA
B1	Sample 10	IL-29	19.868	19.6452	0.195439	3.70392	0.113837		poly(I:C)	13.2412	-9.53724	2.77644	0.316061	-9.8533	-9.22117	743.009	924.992	596.829	181.983	146.18
B2	Sample 10	IL-29	19.565	19.6452	0.195439	3.70392	0.113837		poly(I:C)	13.2412	-9.53724	2.77644	0.316061	-9.8533	-9.22117	743.009	924.992	596.829	181.983	146.18
B3	Sample 10	IL-29	19.5026	19.6452	0.195439	3.70392	0.113837		poly(I:C)	13.2412	-9.53724	2.77644	0.316061	-9.8533	-9.22117	743.009	924.992	596.829	181.983	146.18
B4	Sample 10	IL-28	21.8709	21.9217	0.0796741	5.9804	0.0484003		poly(I:C)	17.183	-11.2026	2.77644	0.134381	-11.337	-11.0682	2356.8	2586.88	2147.19	230.075	209.612
B5	Sample 10	IL-28	22.0135	21.9217	0.0796741	5.9804	0.0484003		poly(I:C)	17.183	-11.2026	2.77644	0.134381	-11.337	-11.0682	2356.8	2586.88	2147.19	230.075	209.612
B6	Sample 10	IL-28	21.8806	21.9217	0.0796741	5.9804	0.0484003		poly(I:C)	17.183	-11.2026	2.77644	0.134381	-11.337	-11.0682	2356.8	2586.88	2147.19	230.075	209.612
B7	Sample 10	IFNB	22.6009	22.7103	0.116805	6.76902	0.0690971		poly(I:C)	12.329	-5.55999	2.77644	0.191844	-5.75184	-5.36815	47.1763	53.8859	41.3022	6.70956	5.87413
B8	Sample 10	IFNB	22.8333	22.7103	0.116805	6.76902	0.0690971		poly(I:C)	12.329	-5.55999	2.77644	0.191844	-5.75184	-5.36815	47.1763	53.8859	41.3022	6.70956	5.87413
B9	Sample 10	IFNB	22.6967	22.7103	0.116805	6.76902	0.0690971		poly(I:C)	12.329	-5.55999	2.77644	0.191844	-5.75184	-5.36815	47.1763	53.8859	41.3022	6.70956	5.87413
B10	Sample 10	GAPDH	15.9226	15.9413	0.0260728				poly(I:C)
B11	Sample 10	GAPDH	15.9302	15.9413	0.0260728				poly(I:C)
B12	Sample 10	GAPDH	15.971	15.9413	0.0260728				poly(I:C)
