# Supplementary material for: MicroRNA-122 supports robust innate immunity in hepatocytes by targeting the RTKs/STAT3 signaling pathway
Source: eLife journal article supplement (doi:10.7554/elife.41159), 2019-02-08
Supplement: supp [file elife-41159-supp-v1.zip › elife_poa_e41159_Figure_1_source_data_4.xlsx]

## Sheet: Sheet1
Data used for illustration
						upper bar	lower bar
	Samples	Target Name	RQmean	RQ Max	RQ Min	RQmax-RQmean	RQmean-RQmin
	HepG2	miR-122	1	1.39798	0.715319	0.397978	0.284681
	Huh7	miR-122	2945.15	3831.27	2263.98	886.115	681.169
	Human liver	miR-122	81857.7	102767	65202.4	20909.7	16655.3
	HepG2 miR-NC	miR-122	0.826394	1.10917	0.615709	0.282776	0.210684
	HepG2 miR-122	miR-122	57968.9	79399.8	42322.4	21430.9	15646.5
Note 1: The expression of miR-122 was presented as "fold" relative to the expression of U6 and normalized to the indicated group.
Note 2: Data presented are one experiment representative of three independent experiments (mean ± s.e.m. of technical triplicates).
Raw data obtained from the QuantStudio(TM) 6 Flex System
Sample Name	Target Name	RQ	RQ Min	RQ Max	CT	Ct Mean	Ct SD
HepG2	U6				12.394	12.5172	0.124097
HepG2	U6				12.6422	12.5172	0.124097
HepG2	U6				12.5155	12.5172	0.124097
HepG2	miR-122	1	0.715319	1.39798	32.4245	32.6933	0.274805
HepG2	miR-122	1	0.715319	1.39798	32.6816	32.6933	0.274805
HepG2	miR-122	1	0.715319	1.39798	32.9737	32.6933	0.274805
Huh7	U6				12.1502	12.2874	0.120813
Huh7	U6				12.3776	12.2874	0.120813
Huh7	U6				12.3346	12.2874	0.120813
Huh7	miR-122	2945.15	2263.98	3831.27	20.7162	20.9394	0.203586
Huh7	miR-122	2945.15	2263.98	3831.27	20.9869	20.9394	0.203586
Huh7	miR-122	2945.15	2263.98	3831.27	21.115	20.9394	0.203586
Human liver	U6				13.4958	13.4674	0.0245252
Human liver	U6				13.4532	13.4674	0.0245252
Human liver	U6				13.4534	13.4674	0.0245252
Human liver	miR-122	81857.7	65202.4	102767	17.1303	17.3226	0.203265
Human liver	miR-122	81857.7	65202.4	102767	17.3022	17.3226	0.203265
Human liver	miR-122	81857.7	65202.4	102767	17.5353	17.3226	0.203265
HepG2 miR-NC	U6				12.7154	12.6562	0.0513429
HepG2 miR-NC	U6				12.6233	12.6562	0.0513429
HepG2 miR-NC	U6				12.63	12.6562	0.0513429
HepG2 miR-NC	miR-122	0.826394	0.615709	1.10917	32.815	33.1074	0.259845
HepG2 miR-NC	miR-122	0.826394	0.615709	1.10917	33.1953	33.1074	0.259845
HepG2 miR-NC	miR-122	0.826394	0.615709	1.10917	33.3118	33.1074	0.259845
HepG2 miR-122	U6				12.4533	12.5131	0.0797725
HepG2 miR-122	U6				12.6037	12.5131	0.0797725
HepG2 miR-122	U6				12.4824	12.5131	0.0797725
HepG2 miR-122	miR-122	57968.9	42322.4	79399.8	16.5631	16.8661	0.271662
HepG2 miR-122	miR-122	57968.9	42322.4	79399.8	16.9475	16.8661	0.271662
HepG2 miR-122	miR-122	57968.9	42322.4	79399.8	17.0878	16.8661	0.271662
