# Supplementary material for: MicroRNA-122 supports robust innate immunity in hepatocytes by targeting the RTKs/STAT3 signaling pathway
Source: eLife journal article supplement (doi:10.7554/elife.41159), 2019-02-08
Supplement: supp [file elife-41159-supp-v1.zip › elife_poa_e41159_Figure_1_source_data_5.xlsx]

## Sheet: Sheet1
Data used for illustration
miR-122/miR-NC, without stimulation
Data from six independent experiments
	exp.1	exp.2	exp.3	exp.4	exp.5	exp.6	Mean	SD
IL-29	1.21977	0.82274	1.81322	1	2.32125	0.995069	1.36201	0.583177
IL-28	1.0736	0.478524	0.153782	5.61821	0.161913	2.92467	1.73512	2.16729
IFN-β	0.988652	2.21935	0.419165	0.888407	0.284551	0.605615	0.900957	0.699332
					upper bar	lower bar								upper bar	lower bar
Sample Name	Target Name	RQmean	RQ Max	RQ Min	RQmax-RQmean	RQmean-RQmin	P value (T-test)		Sample Name	Target Name	RQmean	RQ Max	RQ Min	RQmax-RQmean	RQmean-RQmin	P value (T-test)
miR-NC JFH1	IFNB	1	1.2682	0.788519	0.268201	0.211481			miR-NC SGR	IFNB	1	1.36982	0.730025	0.369817	0.269975
miR-NC JFH1	IL-28	1	1.2644	0.790889	0.2644	0.209111			miR-NC SGR	IL-28	1	1.2474	0.801666	0.247402	0.198334
miR-NC JFH1	IL-29	1	1.34766	0.742028	0.347658	0.257972			miR-NC SGR	IL-29	1	1.22766	0.814555	0.227664	0.185445
miR-122 JFH1	IFNB	239.736	313.508	183.324	73.7713	56.4122	3.09281e-06		miR-122 SGR	IFNB	247.5	271.782	225.388	24.2818	22.1124	0.000319741
miR-122 JFH1	IL-28	112.967	145.556	87.6739	32.5894	25.2928	3.30147e-06		miR-122 SGR	IL-28	143.475	163.283	126.071	19.8075	17.4047	2.94441e-06
miR-122 JFH1	IL-29	373.372	435.099	320.402	61.7272	52.97	0.000135895		miR-122 SGR	IL-29	354.6	434.198	289.594	79.5982	65.006	7.81099e-07
miR-NC poly(I:C)	IFNB	1	2.07276	0.482448	1.07276	0.517552			miR-NC HSV-60	IFNB	1	1.18829	0.841546	0.188289	0.158454
miR-NC poly(I:C)	IL-28	1	2.65207	0.377064	1.65207	0.622936			miR-NC HSV-60	IL-28	1	2.25647	0.443169	1.25647	0.556831
miR-NC poly(I:C)	IL-29	1	1.31141	0.762536	0.311414	0.237464			miR-NC HSV-60	IL-29	1	1.20783	0.827933	0.207826	0.172067
miR-122 poly(I:C)	IFNB	70.6678	88.1193	56.6724	17.4515	13.9953	0.00338527		miR-122 HSV-60	IFNB	8.47606	9.51909	7.54731	1.04303	0.928745	0.000101044
miR-122 poly(I:C)	IL-28	36.4142	58.1344	22.8091	21.7202	13.6051	0.0040059		miR-122 HSV-60	IL-28	2.27129	2.53574	2.03442	0.264449	0.23687	0.48194
miR-122 poly(I:C)	IL-29	151.093	187.721	121.612	36.628	29.4812	1.16549e-06		miR-122 HSV-60	IL-29	2.20996	3.18782	1.53206	0.977856	0.677901	0.218849
miR-NC 3p-hpRNA	IFNB	1	1.15467	0.866049	0.154669	0.133951
miR-NC 3p-hpRNA	IL-28	1	1.07561	0.929706	0.0756093	0.0702944
miR-NC 3p-hpRNA	IL-29	1	1.15731	0.864075	0.157307	0.135925
miR-122 3p-hpRNA	IFNB	16.8236	17.9346	15.7815	1.11094	1.04212	0.00015187
miR-122 3p-hpRNA	IL-28	11.3845	12.0759	10.7328	0.691334	0.651755	6.76274e-09
miR-122 3p-hpRNA	IL-29	9.75141	10.6375	8.93911	0.886108	0.812295	3.14441e-06
miR-NC HBV-1.3	IFNB	1	1.10242	0.907093	0.102422	0.0929068
miR-NC HBV-1.3	IL-28	1	2.43676	0.410382	1.43676	0.589618
miR-NC HBV-1.3	IL-29	1	7.48321	0.133633	6.48321	0.866367
miR-122 HBV-1.3	IFNB	3.2896	3.61957	2.98972	0.329968	0.299887	0.000165056
miR-122 HBV-1.3	IL-28	5.22646	20.9835	1.30178	15.7571	3.92468	0.122477
miR-122 HBV-1.3	IL-29	1.04609	2.21648	0.493713	1.17039	0.552376	0.650455
miR-NC εRNA	IFNB	1	1.12191	0.891334	0.121914	0.108666
miR-NC εRNA	IL-28	1	3003.35	0.000332961	3002.35	0.999667
miR-NC εRNA	IL-29	1	4.93181	0.202765	3.93181	0.797235
miR-122 εRNA	IFNB	6.97715	8.83236	5.51162	1.85521	1.46553	2.28149e-05
miR-122 εRNA	IL-28	4.31541	9.25632	2.01189	4.94092	2.30351	0.747548
miR-122 εRNA	IL-29	1.70104	4.25586	0.679892	2.55482	1.02114	0.863462
Note 1: The expression of IFNs was presented as "fold" relative to the expression of GAPDH and normalized to the indicated groups.
Note 2: Data presented are one experiment representative of three independent experiments (mean ± s.e.m. of 3 or 4 technical replicates).
Note 3: P values were calculated by comparing the Ct values of technical replicates.
For example:
Raw data obtained from the QuantStudio(TM) 6 Flex System
Sample Name	Target Name	RQ	RQ Min	RQ Max	CT	Ct Mean	Ct SD	Delta Ct	Delta Ct Mean	Delta Ct SE	Delta Delta Ct	Ct Threshold		P value (T-test)
miR-NC 3p-hpRNA	GAPDH				14.6758	14.6614	0.0405142					0.02
miR-NC 3p-hpRNA	GAPDH				14.6927	14.6614	0.0405142					0.02
miR-NC 3p-hpRNA	GAPDH				14.6157	14.6614	0.0405142					0.02
miR-NC 3p-hpRNA	IFNB	1	0.866049	1.15467	24.1235	24.0301	0.122929		9.36869	0.0747285	0	0.02
miR-NC 3p-hpRNA	IFNB	1	0.866049	1.15467	24.0759	24.0301	0.122929		9.36869	0.0747285	0	0.02
miR-NC 3p-hpRNA	IFNB	1	0.866049	1.15467	23.8908	24.0301	0.122929		9.36869	0.0747285	0	0.02
miR-NC 3p-hpRNA	IL-28	1	0.929706	1.07561	23.1381	23.116	0.0671186		8.45456	0.0409067	0	0.02
miR-NC 3p-hpRNA	IL-28	1	0.929706	1.07561	23.1503	23.116	0.0671186		8.45456	0.0409067	0	0.02
miR-NC 3p-hpRNA	IL-28	1	0.929706	1.07561	23.1594	23.116	0.0671186		8.45456	0.0409067	0	0.02
miR-NC 3p-hpRNA	IL-28	1	0.929706	1.07561	23.0161	23.116	0.0671186		8.45456	0.0409067	0	0.02
miR-NC 3p-hpRNA	IL-29	1	0.864075	1.15731	21.0783	21.0602	0.157173		6.39883	0.0819936	0	0.02
miR-NC 3p-hpRNA	IL-29	1	0.864075	1.15731	20.9806	21.0602	0.157173		6.39883	0.0819936	0	0.02
miR-NC 3p-hpRNA	IL-29	1	0.864075	1.15731	21.2721	21.0602	0.157173		6.39883	0.0819936	0	0.02
miR-NC 3p-hpRNA	IL-29	1	0.864075	1.15731	20.91	21.0602	0.157173		6.39883	0.0819936	0	0.02
miR-122 3p-hpRNA	GAPDH				15.5435	15.5899	0.0406064					0.02
miR-122 3p-hpRNA	GAPDH				15.6076	15.5899	0.0406064					0.02
miR-122 3p-hpRNA	GAPDH				15.6187	15.5899	0.0406064					0.02
miR-122 3p-hpRNA	IFNB	16.8236	15.7815	17.9346	20.8552	20.8862	0.0407836		5.29627	0.0332274	-4.07242	0.02		0.00015187
miR-122 3p-hpRNA	IFNB	16.8236	15.7815	17.9346	20.9324	20.8862	0.0407836		5.29627	0.0332274	-4.07242	0.02
miR-122 3p-hpRNA	IFNB	16.8236	15.7815	17.9346	20.871	20.8862	0.0407836		5.29627	0.0332274	-4.07242	0.02
miR-122 3p-hpRNA	IL-28	11.3845	10.7328	12.0759	20.5362	20.5355	0.0466944		4.94556	0.0330865	-3.509	0.02		6.76274e-09
miR-122 3p-hpRNA	IL-28	11.3845	10.7328	12.0759	20.5137	20.5355	0.0466944		4.94556	0.0330865	-3.509	0.02
miR-122 3p-hpRNA	IL-28	11.3845	10.7328	12.0759	20.492	20.5355	0.0466944		4.94556	0.0330865	-3.509	0.02
miR-122 3p-hpRNA	IL-28	11.3845	10.7328	12.0759	20.6001	20.5355	0.0466944		4.94556	0.0330865	-3.509	0.02
miR-122 3p-hpRNA	IL-29	9.75141	8.93911	10.6375	18.646	18.7031	0.0856299		3.11322	0.0488134	-3.28561	0.02		3.14441e-06
miR-122 3p-hpRNA	IL-29	9.75141	8.93911	10.6375	18.6325	18.7031	0.0856299		3.11322	0.0488134	-3.28561	0.02
miR-122 3p-hpRNA	IL-29	9.75141	8.93911	10.6375	18.7142	18.7031	0.0856299		3.11322	0.0488134	-3.28561	0.02
miR-122 3p-hpRNA	IL-29	9.75141	8.93911	10.6375	18.8198	18.7031	0.0856299		3.11322	0.0488134	-3.28561	0.02
miR-NC HSV-60	GAPDH				14.4239	14.4529	0.035942					0.02
miR-NC HSV-60	GAPDH				14.4931	14.4529	0.035942					0.02
miR-NC HSV-60	GAPDH				14.4418	14.4529	0.035942					0.02
miR-NC HSV-60	IFNB	0.296516	0.249532	0.352346	25.5037	25.5755	0.151047		11.1225	0.0896419	1.75382	0.02
miR-NC HSV-60	IFNB	0.296516	0.249532	0.352346	25.749	25.5755	0.151047		11.1225	0.0896419	1.75382	0.02
miR-NC HSV-60	IFNB	0.296516	0.249532	0.352346	25.4737	25.5755	0.151047		11.1225	0.0896419	1.75382	0.02
miR-NC HSV-60	IL-28	0.00197586	0.00087564	0.00445848	32.4165	31.8908	0.912523		17.4379	0.456733	8.9833	0.02
miR-NC HSV-60	IL-28	0.00197586	0.00087564	0.00445848	32.8908	31.8908	0.912523		17.4379	0.456733	8.9833	0.02
miR-NC HSV-60	IL-28	0.00197586	0.00087564	0.00445848	31.2982	31.8908	0.912523		17.4379	0.456733	8.9833	0.02
miR-NC HSV-60	IL-28	0.00197586	0.00087564	0.00445848	30.9577	31.8908	0.912523		17.4379	0.456733	8.9833	0.02
miR-NC HSV-60	IL-29	0.111413	0.0922429	0.134568	24.3251	24.0178	0.207844		9.56483	0.105973	3.16601	0.02
miR-NC HSV-60	IL-29	0.111413	0.0922429	0.134568	23.9177	24.0178	0.207844		9.56483	0.105973	3.16601	0.02
miR-NC HSV-60	IL-29	0.111413	0.0922429	0.134568	23.8712	24.0178	0.207844		9.56483	0.105973	3.16601	0.02
miR-NC HSV-60	IL-29	0.111413	0.0922429	0.134568	23.9571	24.0178	0.207844		9.56483	0.105973	3.16601	0.02
miR-122 HSV-60	GAPDH				15.2461	15.2699	0.0481717					0.02
miR-122 HSV-60	GAPDH				15.2383	15.2699	0.0481717					0.02
miR-122 HSV-60	GAPDH				15.3254	15.2699	0.0481717					0.02
miR-122 HSV-60	IFNB	2.51328	2.2379	2.82256	23.3345	23.3091	0.0926777		8.03912	0.0603039	-1.32957	0.02		0.000101044
miR-122 HSV-60	IFNB	2.51328	2.2379	2.82256	23.3864	23.3091	0.0926777		8.03912	0.0603039	-1.32957	0.02
miR-122 HSV-60	IFNB	2.51328	2.2379	2.82256	23.2063	23.3091	0.0926777		8.03912	0.0603039	-1.32957	0.02
miR-122 HSV-60	IL-28	0.00448775	0.00401973	0.00501026	31.5438	31.5243	0.110404		16.2544	0.0618125	7.79979	0.02		0.48194
miR-122 HSV-60	IL-28	0.00448775	0.00401973	0.00501026	31.5887	31.5243	0.110404		16.2544	0.0618125	7.79979	0.02
miR-122 HSV-60	IL-28	0.00448775	0.00401973	0.00501026	31.3629	31.5243	0.110404		16.2544	0.0618125	7.79979	0.02
miR-122 HSV-60	IL-28	0.00448775	0.00401973	0.00501026	31.6018	31.5243	0.110404		16.2544	0.0618125	7.79979	0.02
miR-122 HSV-60	IL-29	0.246219	0.170692	0.355165	23.4567	23.6908	0.407449		8.42081	0.205614	2.02199	0.02		0.218849
miR-122 HSV-60	IL-29	0.246219	0.170692	0.355165	23.5537	23.6908	0.407449		8.42081	0.205614	2.02199	0.02
miR-122 HSV-60	IL-29	0.246219	0.170692	0.355165	23.4546	23.6908	0.407449		8.42081	0.205614	2.02199	0.02
miR-122 HSV-60	IL-29	0.246219	0.170692	0.355165	24.298	23.6908	0.407449		8.42081	0.205614	2.02199	0.02
