# Supplementary material for: MicroRNA-122 supports robust innate immunity in hepatocytes by targeting the RTKs/STAT3 signaling pathway
Source: eLife journal article supplement (doi:10.7554/elife.41159), 2019-02-08
Supplement: supp [file elife-41159-supp-v1.zip › elife_poa_e41159_Figure_1_source_data_6.xlsx]

## Sheet: Sheet1
Data used for illustration
IFN-β (pg/ml)									IL-29/IL-28B (pg/ml)
		exp.1	exp.2	Mean	STDEV	P value (T-test)					exp.1	exp.2	Mean	STDEV	P value (T-test)
JFH1	miR-NC	ND	ND	ND	0				JFH1	NC	114.045	109.503	111.774	3.21151
JFH1	miR-122	99.7262	99.026	99.3761	0.49512	8.08837e-12			JFH1	miR-122	908.794	1019.48	964.138	78.2685	0.00206442
		exp.1	exp.2	Mean	STDEV	P value (T-test)					exp.1	exp.2	Mean	STDEV	P value (T-test)
Poly(I:C)	miR-NC	59.8269	46.6315	53.2292	9.33051				Poly(I:C)	miR-NC	1032.71	872.6	952.656	113.217
Poly(I:C)	miR-122	413.867	367.593	390.73	32.7209	7.30509e-05			Poly(I:C)	miR-122	3604.55	3111.36	3357.95	348.742	3.97412e-05
Note 1: The protein level of IFNs was presented as concentration (pg/ml).
Note 2: Data presented are two independent experiments (mean + SD).
Note 3: P values were calculated by comparing the A450-A570 values.
The protein concentration was calculted as follows:
1. The ELISA plates were read successively at 450 nm and 570 nm to obtain the absorbance of each well.
2. The values (A-450-A570) were calculated and the standard curve was generated.
3. The protein concentration was calculted accoding to the fomulas obtained.
	IFN-β standard	Value (A450-A570)							IL-29 standard	Value (A450-A570)
	(pg/ml)	Repeat 1	Repeat 2	Mean					(pg/ml)	Repeat 1	Repeat 2	Mean
	500	1.72892	1.60702	1.66797					4000	0.927761	0.842624	0.885192
	250	0.921546	0.912858	0.917202					2000	0.616238	0.521665	0.568951
	125	0.54141	0.502045	0.521727					1000	0.405799	0.383451	0.394625
	62.5	0.314944	0.301575	0.308259					500	0.309535	0.273618	0.291576
	31.3	0.193361	0.182102	0.187732					250	0.261155	0.246766	0.253961
	15.6	0.139581	0.128671	0.134126					125	0.24283	0.242398	0.242614
	7.81	0.106845	0.106863	0.106854					62.5	0.228834	0.213997	0.221415
	3.9	0.0921263	0.0988123	0.0954693					31.25	0.23041	0.205533	0.217972
	IFN-β (pg/ml)		x=(y-0.096)/0.0032						IL-29/IL-28B (pg/ml)		x=(y-0.2158)/0.0002
			Value (A450-A570)									Value (A450-A570)
			replicate 1	replicate 2	Mean	IFNβ (pg/ml)						replicate 1	replicate 2	Mean	IFNL (pg/ml)
exp.1	JFH1	NC	0.0861903	0.0828064	0.0844984	-3.59426			exp.1	JFH1	NC	0.237312	0.239906	0.238609	114.045
	JFH1	miR-122	0.412238	0.41801	0.415124	99.7262				JFH1	miR-122	0.402199	0.392919	0.397559	908.794
exp.2	JFH1	NC	0.0872474	0.0906713	0.0889593	-2.2002			exp.2	JFH1	NC	0.234825	0.240576	0.237701	109.503
	JFH1	miR-122	0.413957	0.411809	0.412883	99.026				JFH1	miR-122	0.458296	0.381097	0.419696	1019.48
exp.1	Poly(I:C)	NC	0.288327	0.286565	0.287446	59.8269			exp.1	Poly(I:C)	NC	0.457195	0.38749	0.422343	1032.71
	Poly(I:C)	miR-122	1.45604	1.38471	1.42038	413.867				Poly(I:C)	miR-122	0.950083	0.923337	0.93671	3604.55
exp.2	Poly(I:C)	NC	0.244845	0.245597	0.245221	46.6315			exp.2	Poly(I:C)	NC	0.321229	0.459411	0.39032	872.6
	Poly(I:C)	miR-122	1.29011	1.25449	1.2723	367.593				Poly(I:C)	miR-122	0.858524	0.817618	0.838071	3111.36
P value calculation
			exp.1	exp.1	exp.2	exp.2						exp.1	exp.1	exp.2	exp.2
			replicate 1	replicate 2	replicate 1	replicate 2	P value (T-test)					replicate 1	replicate 2	replicate 1	replicate 2	P value (T-test)
	JFH1	NC	0.0861903	0.0828064	0.0872474	0.0906713				JFH1	NC	0.237312	0.239906	0.234825	0.240576
	JFH1	miR-122	0.412238	0.41801	0.413957	0.411809	8.08837e-12			JFH1	miR-122	0.402199	0.392919	0.458296	0.381097	0.00206442
							P value (T-test)									P value (T-test)
	Poly(I:C)	NC	0.288327	0.286565	0.244845	0.245597				Poly(I:C)	NC	0.457195	0.38749	0.321229	0.459411
	Poly(I:C)	miR-122	1.45604	1.38471	1.29011	1.25449	7.30509e-05			Poly(I:C)	miR-122	0.950083	0.923337	0.858524	0.817618	3.97412e-05
