# Supplementary material for: MicroRNA-122 supports robust innate immunity in hepatocytes by targeting the RTKs/STAT3 signaling pathway
Source: eLife journal article supplement (doi:10.7554/elife.41159), 2019-02-08
Supplement: supp [file elife-41159-supp-v1.zip › elife_poa_e41159_Figure_1_source_data_7.xlsx]

## Sheet: Sheet1
Data used for illustration
						upper bar	lower bar
	Sample Name	Target Name	RQmean	RQ Max	RQ Min	RQmax-RQmean	RQmean-RQmin	P value (T-test)
	NC JFH1	CXCL9	1	3.64832	0.274099	2.64832	0.725901
	NC JFH1	CXCL10	1	1.84668	0.541512	0.846682	0.458488
	NC JFH1	MDA-5	1	1.16215	0.860475	0.162149	0.139525
	NC JFH1	RIG-I	1	1.15867	0.86306	0.158669	0.13694
	122 JFH1	CXCL9	30.9495	36.0094	26.6006	5.05992	4.34892	0.00501397
	122 JFH1	CXCL10	67.6912	84.4561	54.2542	16.7649	13.437	0.00146446
	122 JFH1	MDA-5	32.8432	34.4677	31.2953	1.6245	1.54793	7.86192e-05
	122 JFH1	RIG-I	52.5981	59.9157	46.1742	7.3176	6.42389	9.41935e-07
Note 1: The expression of ISGs was presented as "fold" relative to the expression of GAPDH and normalized to the indicated group.
Note 2: Data presented are one experiment representative of three independent experiments (mean ± s.e.m. of technical triplicates).
Note 3: P values were calculated by comparing the Ct values of technical replicates.
