# Supplementary material for: MicroRNA-122 supports robust innate immunity in hepatocytes by targeting the RTKs/STAT3 signaling pathway
Source: eLife journal article supplement (doi:10.7554/elife.41159), 2019-02-08
Supplement: supp [file elife-41159-supp-v1.zip › elife_poa_e41159_Figure_1_source_data_8.xlsx]

## Sheet: Sheet1
Data used for illustration
							upper bar	lower bar
		Sample Name	Target Name	RQmean	RQ Max	RQ Min	RQmax-RQmean	RQmean-RQmin	P value (T-test)
		Huh7-NC+JFH1	IL-29	1	1.22878	0.813814	0.228782	0.186186
		Huh7-NC+JFH1	IL-28	1	1.22189	0.818406	0.221887	0.181594
		Huh7-NC+JFH1	IFNB	1	1.83598	0.544669	0.835976	0.455331
		Huh7-122+JFH1	IL-29	3.13638	4.18029	2.35316	1.04391	0.783221	0.000785765
		Huh7-122+JFH1	IL-28	3.82627	5.12333	2.85759	1.29706	0.968685	0.00015104
		Huh7-122+JFH1	IFNB	3.78273	5.00779	2.85735	1.22506	0.925373	0.0232595
Note 1: The expression of IFNs was presented as "fold" relative to the expression of GAPDH and normalized to the indicated group.
Note 2: Data presented are one experiment representative of three independent experiments (mean ± s.e.m. of 6 technical replicates).
Note 3: P values were calculated by comparing the Ct values of technical replicates.
