# Supplementary material for: MicroRNA-122 supports robust innate immunity in hepatocytes by targeting the RTKs/STAT3 signaling pathway
Source: eLife journal article supplement (doi:10.7554/elife.41159), 2019-02-08
Supplement: supp [file elife-41159-supp-v1.zip › elife_poa_e41159_Figure_2_figure_supplement_1.pdf]

## Figure 2-figure supplement 1

**A**

pSGR-JFH1/Gluc:

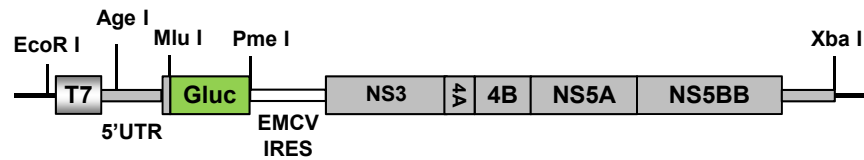

**B**

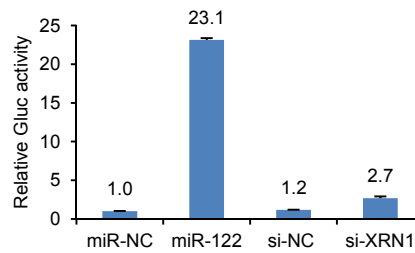

**C**

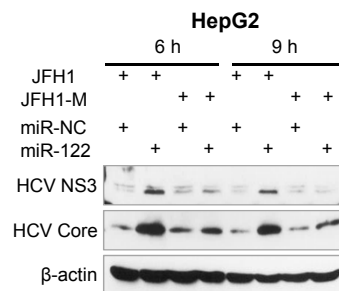

**Figure 2-figure supplement 1.** The effect of miR-122 on HCV translation. **(A)** Structure of pSGR-JFH1/Gluc constructs. **(B)** Luciferase assays of the activity of Gluc reporter treated with miR-122 mimic or XRN1 siRNA. HepG2 cells were firstly treated with mimics or siRNAs for 48 hours and then transfected with SGR-JFH1/Gluc RNA for 24 hours. The activities of Gluc were measured and normalized to the level in miR-NC-treated cells. Data shown are mean +SD (n = 3). Gluc data are one experiment representative of three independent experiments (mean ± SEM of technical triplicates). **(C)** Comparing the effect of miR-122 on the translation of wild-type (JFH1) and mutant (JFH1-M) HCV.
