# Supplementary material for: MicroRNA-122 supports robust innate immunity in hepatocytes by targeting the RTKs/STAT3 signaling pathway
Source: eLife journal article supplement (doi:10.7554/elife.41159), 2019-02-08
Supplement: supp [file elife-41159-supp-v1.zip › elife_poa_e41159_Figure_2_source_data_1.xlsx]

## Sheet: Sheet1
Data used for illustration
						upper bar	lower bar
	Sample Name	Target Name	RQmean	RQ Max	RQ Min	RQmax-RQmean	RQmean-RQmin	P value (T-test)
	NC 24 JFH1	HCV	1	1.04034	0.961226	0.0403385	0.0387744
	122 24 JFH1	HCV	1.47272	1.63454	1.32692	0.161817	0.145798	0.0323733
Note 1: The expression of HCV RNA was presented as "fold" relative to the expression of GAPDH and normalized to the indicated group.
Note 2: Data presented are one experiment representative of three independent experiments (mean ± s.e.m. of technical triplicates).
Note 3: P values were calculated by comparing the Ct values of technical replicates.
