# Supplementary material for: MicroRNA-122 supports robust innate immunity in hepatocytes by targeting the RTKs/STAT3 signaling pathway
Source: eLife journal article supplement (doi:10.7554/elife.41159), 2019-02-08
Supplement: supp [file elife-41159-supp-v1.zip › elife_poa_e41159_Figure_2_source_data_2.xlsx]

## Sheet: Figure S11
Data used for illustration
Gluc activity
			replicate 1	replicate 2	replicate 3	Mean	normalization	Fold	STDEV
		miR-NC	38572	40513	38050	39045	39045	1	0.0332396
		miR-122	1143897	780025	787572	903831	39045	23.1485	0.230062
		si-NC	44047	46945	46021	45671	39045	1.1697	0.0324136
		si-XRN1	95254	131380	87119	104584	39045	2.67856	0.225268
Note 1: The Gluc activities were presented as "fold" and normalized to the miR-NC group.
Note 2: Data presented are one experiment representative of three independent experiments (mean ± s.e.m. of technical triplicates).
