# Supplementary material for: MicroRNA-122 supports robust innate immunity in hepatocytes by targeting the RTKs/STAT3 signaling pathway
Source: eLife journal article supplement (doi:10.7554/elife.41159), 2019-02-08
Supplement: supp [file elife-41159-supp-v1.zip › elife_poa_e41159_Figure_2_source_data_3.xlsx]

## Sheet: Sheet1
Data used for illustration
						upper bar	lower bar
	HCV RNA transfection (μg/ml)	Target Name	RQmean	RQ Max	RQ Min	RQmax-RQmean	RQmean-RQmin
	3ug	IFNB	1.61042	1.72379	1.5045	0.113377	0.10592
	3ug	IL-28	2.00977	2.10928	1.91496	0.0995026	0.0948088
	3ug	IL-29	2.12724	2.29981	1.96761	0.172573	0.159624
	3ug	HCV	7.26019	8.01859	6.57351	0.758403	0.686673
	1ug	IFNB	1	1.14602	0.872584	0.146022	0.127416
	1ug	IL-28	1	1.1394	0.877653	0.139403	0.122347
	1ug	IL-29	1	1.10261	0.906942	0.102606	0.093058
	1ug	HCV	1	1.20673	0.828684	0.206733	0.171316
	0.3ug	IFNB	0.271821	0.301639	0.24495	0.0298181	0.0268704
	0.3ug	IL-28	0.143941	0.165118	0.125481	0.0211768	0.0184608
	0.3ug	IL-29	0.118286	0.131652	0.106276	0.0133667	0.0120096
	0.3ug	HCV	0.191435	0.272879	0.1343	0.0814432	0.0571357
	0.1ug	IFNB	0.00723127	0.0129406	0.00404086	0.00570936	0.00319041
	0.1ug	IL-28	0.00126846	0.00150224	0.00107107	0.000233776	0.000197396
	0.1ug	IL-29	0.00167579	0.00223503	0.00125648	0.000559238	0.000419308
	0.1ug	HCV	0.062838	0.0677999	0.0582392	0.00496194	0.0045988
	0.03ug	IFNB	0.0078226	0.0090703	0.00674653	0.0012477	0.00107607
	0.03ug	IL-28	7.62291e-05	0.00054769	1.06098e-05	0.000471461	6.56193e-05
	0.03ug	IL-29	0.000406634	0.000506277	0.000326603	9.96425e-05	8.00314e-05
	0.03ug	HCV	0.00732812	0.00794722	0.00675724	0.000619103	0.000570874
	0ug	IFNB	0.00596061	0.0109906	0.00323266	0.00502998	0.00272795
	0ug	IL-28	2.38792e-06	0	0	0	0
	0ug	IL-29	0.000324233	0.000630014	0.000166864	0.000305782	0.000157368
	0ug	HCV	2.42168e-10	0	0	0	0
Note 1: The expression of IFN mRNAs and HCV RNA were presented as "fold" relative to the expression of GAPDH and normalized to the indicated group.
Note 2: Data presented are one experiment representative of three independent experiments (mean ± s.e.m. of technical triplicates).
