# Supplementary material for: MicroRNA-122 supports robust innate immunity in hepatocytes by targeting the RTKs/STAT3 signaling pathway
Source: eLife journal article supplement (doi:10.7554/elife.41159), 2019-02-08
Supplement: supp [file elife-41159-supp-v1.zip › elife_poa_e41159_Figure_2_source_data_4.xlsx]

## Sheet: Sheet1
Data used for illustration
							upper bar	lower bar
		Sample Name	Target Name	RQmean	RQ Max	RQ Min	RQmax-RQmean	RQmean-RQmin	P value (T-test)
		NC JFH1	IL-28	1	1.31921	0.758031	0.319207	0.241969
		NC JFH1	IL-29	1	1.39753	0.715547	0.397533	0.284453
		NC JFH1	IFNB	1	1.08692	0.920034	0.0869169	0.0799665
		122 JFH1	IL-28	176.393	223.232	139.381	46.8396	37.0115	5.17721e-06
		122 JFH1	IL-29	722.689	805.888	648.079	83.199	74.6096	0.000141135
		122 JFH1	IFNB	246.97	294.259	207.28	47.2892	39.6895	1.24723e-05
		NC JFH1-M	IL-28	0.402454	0.71706	0.22588	0.314606	0.176574
		NC JFH1-M	IL-29	0.234757	0.291471	0.189078	0.0567138	0.0456786
		NC JFH1-M	IFNB	0.247417	0.334335	0.183096	0.0869176	0.0643215
		122 JFH1-M	IL-28	180.854	213.372	153.293	32.5175	27.5619	0.000733379
		122 JFH1-M	IL-29	513.412	562.97	468.217	49.5578	45.1953	2.48294e-05
		122 JFH1-M	IFNB	257.357	291.108	227.52	33.7505	29.8375	5.87215e-05
Note 1: The expression of IFNs was presented as "fold" relative to the expression of GAPDH and normalized to the indicated group.
Note 2: Data presented are one experiment representative of three independent experiments (mean ± s.e.m. of technical triplicates).
Note 3: P values were calculated by comparing the Ct values of technical replicates.
