# Supplementary material for: MicroRNA-122 supports robust innate immunity in hepatocytes by targeting the RTKs/STAT3 signaling pathway
Source: eLife journal article supplement (doi:10.7554/elife.41159), 2019-02-08
Supplement: supp [file elife-41159-supp-v1.zip › elife_poa_e41159_Figure_3_figure_supplement_1.pdf]

## Figure 3-figure supplement 1

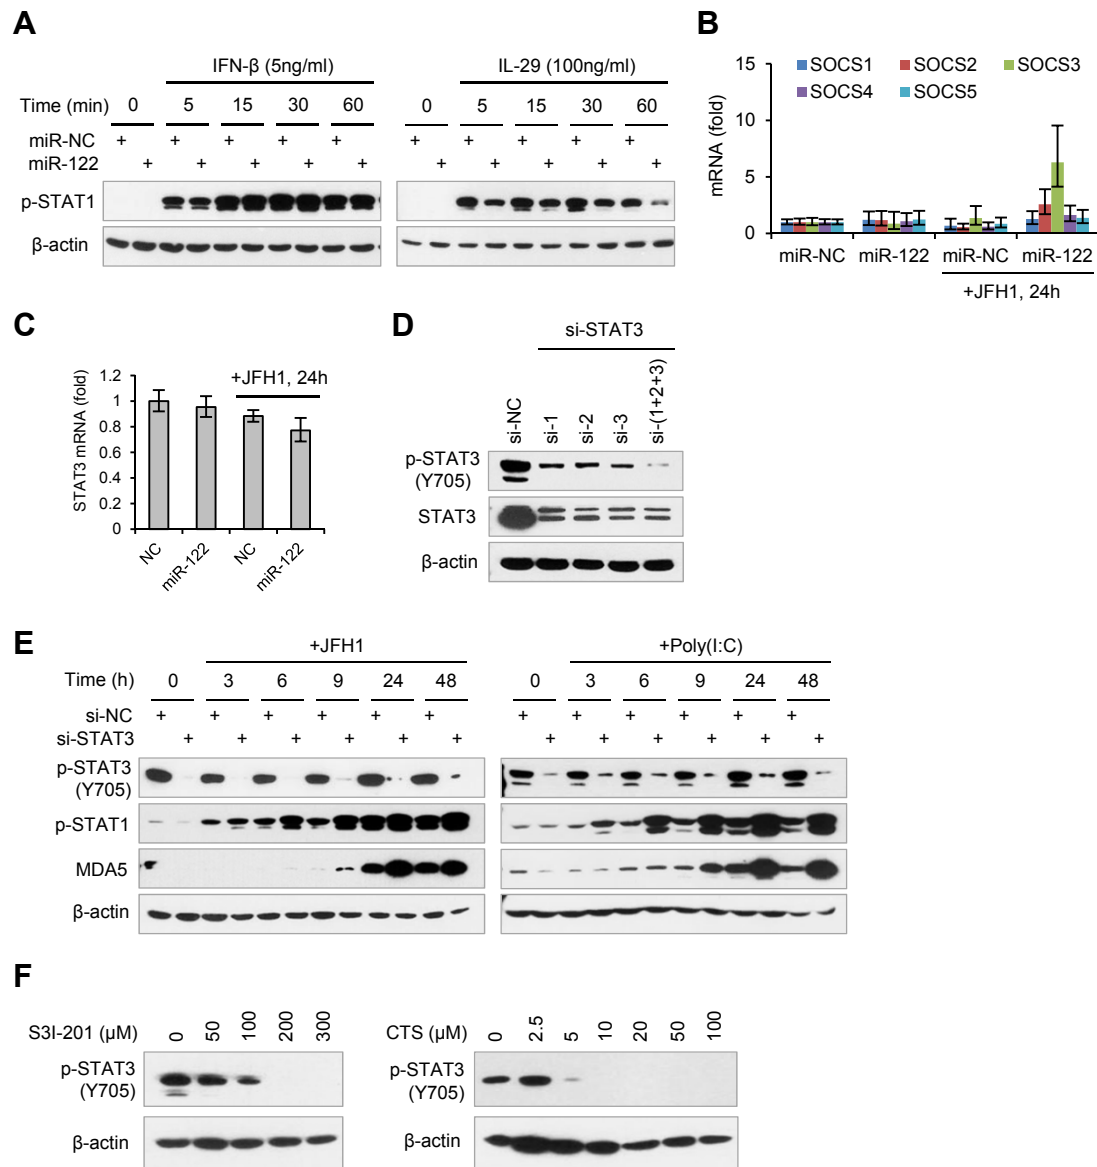

**Figure 3-figure supplement 1.** miR-122 regulates IFN response by repressing STAT3 phosphorylation. **(A)** Analysis of p-STAT1 expression in HepG2 cells first transfected with mimics (NC or miR-122) for 2 days and then treated with IFN- $\beta$  or IL-29 for 5-60 minutes. **(B)** qRT-PCR analysis of the five SOCS genes in HepG2 cells first treated with mimics for 2 days, and then transfected with JFH1 RNA for 24 hours. **(C)** qRT-PCR analysis of STAT3 mRNA in HepG2 cells, treated as in B. **(D)** Analysis of total and phosphorylated STAT3 in HepG2 cells treated with three independent siRNAs (si-1, si-2 and si-3) at final concentration of 20nM. **(E)** Analysis of p-STAT1 and MDA5 in HepG2 cells transfected with STAT3 siRNA and then treated with JFH1 RNA or poly(I:C). **(F)** Analysis of the dose-dependent effects of Cryptotanshinone (CTS) and S3I-201 on p-STAT3. HepG2 cells were treated with either CST or S3I-201 at indicated concentration for 24 hours. qRT-PCR data are one experiment representative of two (B) or three (C) independent experiments (mean  $\pm$  SEM of technical triplicates).
