# Supplementary material for: MicroRNA-122 supports robust innate immunity in hepatocytes by targeting the RTKs/STAT3 signaling pathway
Source: eLife journal article supplement (doi:10.7554/elife.41159), 2019-02-08
Supplement: supp [file elife-41159-supp-v1.zip › elife_poa_e41159_Figure_3_figure_supplement_2.pdf]

## Figure 3-figure supplement 2

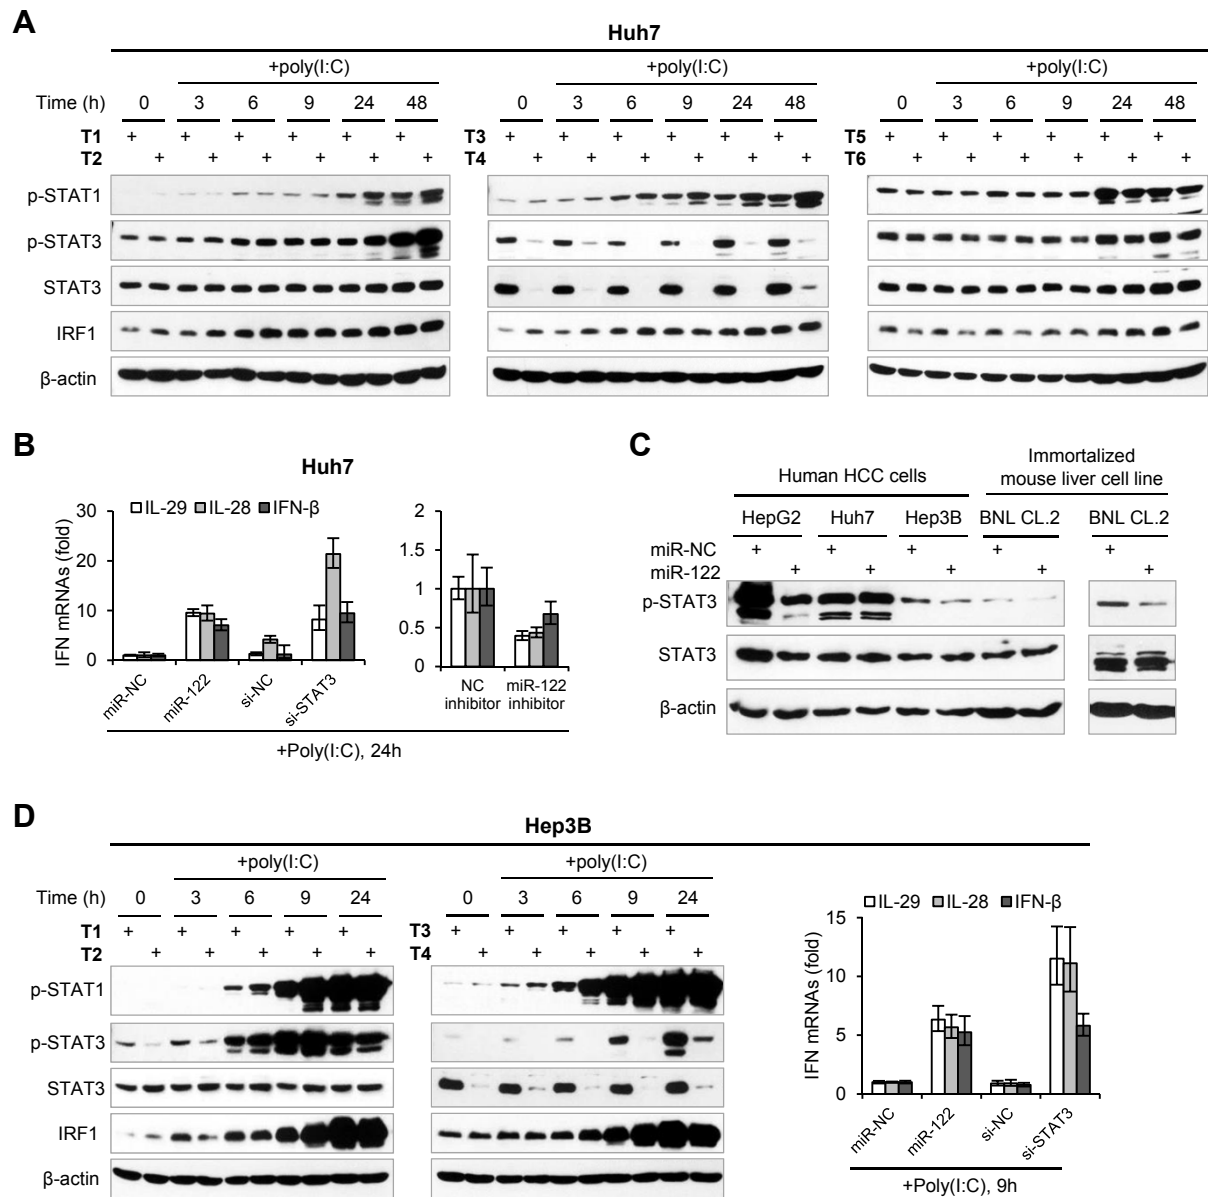

T1, miR-NC (20nM); T2, miR-122 (20nM); T3, si-NC (20nM); T4, si-STAT3 (20nM); T5, NC inhibitor (40nM); T6, miR-122 inhibitor (40nM).

**Figure 3-figure supplement 2.** The effects of miR-122 on p-STAT3 and IFN response in different liver cell lines. **(A)** Western blot analysis of p-STAT1, p-STAT3 and IRF1 in Huh7 cells first transfected with mimics, siRNAs or inhibitors (for 2 days), and then treated with poly(I:C) for indicated times. **(B)** qRT-PCR analysis of IFN mRNA Huh7 cells, treated as in A. **(C)** Western blot analysis of p-STAT3 expression in cells transfected with mimics (NC or miR-122) for 2 days. **(D)** Analysis of indicated proteins or IFN mRNAs in Hep3B cells, treated as in B. qRT-PCR data are one experiment representative of three independent experiments (mean  $\pm$  SEM of technical triplicates).
