# Supplementary material for: MicroRNA-122 supports robust innate immunity in hepatocytes by targeting the RTKs/STAT3 signaling pathway
Source: eLife journal article supplement (doi:10.7554/elife.41159), 2019-02-08
Supplement: supp [file elife-41159-supp-v1.zip › elife_poa_e41159_Figure_3_source_data_1.xlsx]

## Sheet: Sheet1
Data used for illustration
							upper bar	lower bar
		Sample Name	Target Name	RQmean	RQmax	RQmin	RQmax-RQmean	RQmean-RQmin
		NC	SOCS1	1	1.24604	0.802543	0.246038	0.197457
		NC	SOCS2	1	1.31383	0.761131	0.313835	0.238869
		NC	SOCS3	1	1.37628	0.726594	0.376284	0.273406
		NC	SOCS4	1	1.25896	0.794307	0.258959	0.205693
		NC	SOCS5	1	1.24835	0.801059	0.248347	0.198941
		122	SOCS1	1.20108	1.94082	0.743289	0.739742	0.45779
		122	SOCS2	1.17657	1.98069	0.698902	0.804127	0.477666
		122	SOCS3	0.864927	1.9075	0.392188	1.04257	0.472739
		122	SOCS4	1.08061	1.79538	0.6504	0.714772	0.430209
		122	SOCS5	1.2394	2.00542	0.765983	0.766016	0.473418
		NC+JFH1	SOCS1	0.684952	1.30214	0.360297	0.617192	0.324655
		NC+JFH1	SOCS2	0.55431	0.8732	0.351877	0.318891	0.202433
		NC+JFH1	SOCS3	1.36703	2.41749	0.773025	1.05046	0.594008
		NC+JFH1	SOCS4	0.595315	0.984724	0.359897	0.389409	0.235417
		NC+JFH1	SOCS5	0.854494	1.40339	0.520282	0.548899	0.334212
		122+JFH1	SOCS1	1.27158	1.97217	0.819868	0.700591	0.451714
		122+JFH1	SOCS2	2.57488	3.91257	1.69454	1.33769	0.880339
		122+JFH1	SOCS3	6.28321	9.53991	4.13826	3.25671	2.14494
		122+JFH1	SOCS4	1.63671	2.47048	1.08433	0.833775	0.55238
		122+JFH1	SOCS5	1.3809	2.08494	0.914606	0.704033	0.466298
Note 1: The expression of SOCSs was presented as "fold" relative to the expression of GAPDH and normalized to the indicated groups.
Note 2: Data presented are one experiment representative of two independent experiments (mean ± s.e.m. of technical triplicates).
