# Supplementary material for: MicroRNA-122 supports robust innate immunity in hepatocytes by targeting the RTKs/STAT3 signaling pathway
Source: eLife journal article supplement (doi:10.7554/elife.41159), 2019-02-08
Supplement: supp [file elife-41159-supp-v1.zip › elife_poa_e41159_Figure_3_source_data_2.xlsx]

## Sheet: Sheet1
Data used for illustration
Fold (Flu/Rlu)				exp.1	exp.2	exp.3
			Reporter	Ratio	Ratio	Ratio	Fold	STDEV	P value (T-test)
	miR-NC	0h	STAT3	1	1	1	1	0
	miR-NC	6h	STAT3	0.957769	0.903445	0.990734	0.95065	0.0440778
	miR-NC	24h	STAT3	1.28705	0.993863	1.53677	1.27256	0.271742
	miR-122	0h	STAT3	0.223113	0.334606	0.410504	0.322741	0.0942572	0.00639466
	miR-122	6h	STAT3	0.210279	0.25028	0.449979	0.303513	0.12841	0.00743727
	miR-122	24h	STAT3	0.282398	0.404304	0.480526	0.389076	0.099938	0.0200121
Note 1: The luciferase activity of STAT3-responsive reporter was presented as "fold" (Flu/Rlu) and normalized to the indicated group.
Note 2: Data presented are three independent experiments (mean + s.d. of experimental repeats).
Note 3: P values were calculated by comparing the "ratio" of experimental repeats.
