# Supplementary material for: MicroRNA-122 supports robust innate immunity in hepatocytes by targeting the RTKs/STAT3 signaling pathway
Source: eLife journal article supplement (doi:10.7554/elife.41159), 2019-02-08
Supplement: supp [file elife-41159-supp-v1.zip › elife_poa_e41159_Figure_3_source_data_3.xlsx]

## Sheet: Sheet1
Data used for illustration
							upper bar	lower bar
		Sample Name	Target Name	RQmean	RQmax	RQmin	RQmax-RQmean	RQmean-RQmin
		NC	STAT3	1	1.08635	0.920516	0.0863476	0.0794843
		122	STAT3	0.954333	1.03869	0.876825	0.0843587	0.0775074
		NC+JFH1	STAT3	0.883915	0.930614	0.839559	0.0466995	0.044356
		122+JFH1	STAT3	0.77164	0.869182	0.685044	0.0975423	0.0865958
Note 1: The expression of STAT3 mRNA was presented as "fold" relative to the expression of GAPDH and normalized to the indicated groups.
Note 2: Data presented are one experiment representative of three independent experiments (mean ± s.e.m. of technical triplicates).
