# Supplementary material for: MicroRNA-122 supports robust innate immunity in hepatocytes by targeting the RTKs/STAT3 signaling pathway
Source: eLife journal article supplement (doi:10.7554/elife.41159), 2019-02-08
Supplement: supp [file elife-41159-supp-v1.zip › elife_poa_e41159_Figure_3_source_data_4.xlsx]

## Sheet: Sheet1
Data used for illustration
						upper bar	lower bar
	Sample Name	Target Name	RQmean	RQ Max	RQ Min	RQmax-RQmean	RQmean-RQmin	P value (T-test)
	NC JFH1	IL-29	1	1.31252	0.761896	0.312516	0.238104
	NC JFH1	IL-28	1	1.47643	0.67731	0.47643	0.32269
	NC JFH1	IFNB	1	1.6489	0.606466	0.648898	0.393534
	122 JFH1	IL-29	510.592	698.354	373.312	187.762	137.279	7.29956e-05
	122 JFH1	IL-28	66.3511	83.5471	52.6944	17.196	13.6567	0.000378186
	122 JFH1	IFNB	128.045	160.449	102.186	32.4035	25.8594	0.00106723
	si-NC JFH1	IL-29	19.0498	26.0506	13.9304	7.00076	5.11939
	si-NC JFH1	IL-28	27.121	40.6186	18.1087	13.4975	9.01231
	si-NC JFH1	IFNB	20.3015	27.3843	15.0506	7.08283	5.25089
	si-STAT3 JFH1	IL-29	3674.62	5537.11	2438.6	1862.49	1236.01	9.42107e-07
	si-STAT3 JFH1	IL-28	1297.07	2266.06	742.429	968.989	554.64	0.000128022
	si-STAT3 JFH1	IFNB	1366.84	2021.98	923.967	655.14	442.868	6.68793e-07
Note 1: The expression of IFNs was presented as "fold" relative to the expression of GAPDH and normalized to the indicated groups.
Note 2: Data presented are one experiment representative of three independent experiments (mean ± s.e.m. of technical triplicates).
Note 3: P values were calculated by comparing the Ct values of technical replicates.
