# Supplementary material for: MicroRNA-122 supports robust innate immunity in hepatocytes by targeting the RTKs/STAT3 signaling pathway
Source: eLife journal article supplement (doi:10.7554/elife.41159), 2019-02-08
Supplement: supp [file elife-41159-supp-v1.zip › elife_poa_e41159_Figure_3_source_data_5.xlsx]

## Sheet: Sheet1
Data used for illustration
	IFN-β (pg/ml)									IL-29/IL-28B (pg/ml)
			exp.1	exp.2	Mean	STDEV	P value (T-test)					exp.1	exp.2	Mean	STDEV	P value (T-test)
	JFH1	si-NC	80.3869	98.2826	89.3348	12.6542				JFH1	si-NC	552.673	697.984	625.328	126.64
	JFH1	si-STAT3	603.643	567.139	585.391	25.8123	1.76486e-06			JFH1	si-STAT3	2343.74	2046.99	2195.36	239.743	0.000150088
Note 1: The protein level of IFNs was presented as concentration (pg/ml).
Note 2: Data presented are two independent experiments (mean + SD).
Note 3: P values were calculated by comparing the A450-A570 values.
