# Supplementary material for: MicroRNA-122 supports robust innate immunity in hepatocytes by targeting the RTKs/STAT3 signaling pathway
Source: eLife journal article supplement (doi:10.7554/elife.41159), 2019-02-08
Supplement: supp [file elife-41159-supp-v1.zip › elife_poa_e41159_Figure_3_source_data_6.xlsx]

## Sheet: Sheet1
Data used for illustration
						upper bar	lower bar
	Sample Name	Target Name	RQmean	RQmax	RQmin	RQmax-RQmean	RQmean-RQmin	P value (T-test)
	si-NC poly(I:C)	IL-29	1	1.1607	0.861549	0.1607	0.138451
	si-NC poly(I:C)	IL-28	1	1.34233	0.744973	0.342331	0.255027
	si-NC poly(I:C)	IFNB	1	1.35296	0.739121	0.352958	0.260879
	si-STAT3 poly(I:C)	IL-29	104.358	127.455	85.4472	23.0966	18.9112	8.82096e-05
	si-STAT3 poly(I:C)	IL-28	62.3426	82.6019	47.0522	20.2593	15.2904	8.30194e-06
	si-STAT3 poly(I:C)	IFNB	37.4976	46.926	29.9635	9.42844	7.53406	3.68426e-05
Note 1: The expression of IFNs was presented as "fold" relative to the expression of GAPDH and normalized to the indicated groups.
Note 2: Data presented are one experiment representative of three independent experiments (mean ± s.e.m. of technical triplicates).
Note 3: P values were calculated by comparing the Ct values of technical replicates.
