# Supplementary material for: MicroRNA-122 supports robust innate immunity in hepatocytes by targeting the RTKs/STAT3 signaling pathway
Source: eLife journal article supplement (doi:10.7554/elife.41159), 2019-02-08
Supplement: supp [file elife-41159-supp-v1.zip › elife_poa_e41159_Figure_3_source_data_7.xlsx]

## Sheet: Sheet1
Data used for illustration
						upper bar	lower bar
	Sample Name	Target Name	RQmean	RQmax	RQmin	RQmax-RQmean	RQmean-RQmin	P value (T-test)
	201-0+IC	IL-28	1	1.76915	0.565242	0.769154	0.434758
	201-0+IC	IL-29	1	1.41184	0.708295	0.411841	0.291705
	201-0+IC	IFNB	1	1.43317	0.697755	0.433168	0.302245
	201-100+IC	IL-28	31.8583	37.2345	27.2583	5.37619	4.59994	0.0035235
	201-100+IC	IL-29	78.9642	92.7124	67.2548	13.7481	11.7094	5.34002e-06
	201-100+IC	IFNB	51.519	56.1117	47.3021	4.59277	4.21685	0.000214559
	Cry-0+IC	IL-28	2.2366	3.56499	1.40319	1.3284	0.833406
	Cry-0+IC	IL-29	2.37092	3.33711	1.68446	0.966196	0.686453
	Cry-0+IC	IFNB	1.9878	2.82581	1.39831	0.838004	0.589491
	Cry-5+IC	IL-28	33.5758	44.5249	25.3193	10.949	8.25658	0.000418511
	Cry-5+IC	IL-29	53.1861	64.468	43.8785	11.2819	9.30758	3.49346e-07
	Cry-5+IC	IFNB	47.3435	57.2831	39.1286	9.93962	8.21492	9.56909e-05
Note 1: The expression of IFNs was presented as "fold" relative to the expression of GAPDH and normalized to the indicated groups.
Note 2: Data presented are one experiment representative of three independent experiments (mean ± s.e.m. of technical triplicates).
Note 3: P values were calculated by comparing the Ct values of technical replicates.
