# Supplementary material for: MicroRNA-122 supports robust innate immunity in hepatocytes by targeting the RTKs/STAT3 signaling pathway
Source: eLife journal article supplement (doi:10.7554/elife.41159), 2019-02-08
Supplement: supp [file elife-41159-supp-v1.zip › elife_poa_e41159_Figure_3_source_data_8.xlsx]

## Sheet: sheet1
Data used for illustration
		Sample Name	Target Name	RQ	RQ Min	RQ Max	RQmax-RQmean	RQmean-RQmin
		Huh7-NC+IC	IL-29	1	0.891	1.122	0.122	0.109
		Huh7-NC+IC	IL-28	1	0.623	1.605	0.605	0.377
		Huh7-NC+IC	IFNB1	1	0.762	1.312	0.312	0.238
		Huh7-122+IC	IL-29	9.565	8.88	10.303	0.738	0.685
		Huh7-122+IC	IL-28	9.386	7.972	11.052	1.665	1.414
		Huh7-122+IC	IFNB1	7.062	6.025	8.278	1.215	1.037
		Huh7-si-NC+IC	IL-29	1.27	0.998	1.617	0.347	0.272
		Huh7-si-NC+IC	IL-28	4.167	3.517	4.938	0.771	0.651
		Huh7-si-NC+IC	IFNB1	1.18	0.46	3.024	1.844	0.72
		Huh7-si-STAT3+IC	IL-29	8.203	6.097	11.038	2.835	2.107
		Huh7-si-STAT3+IC	IL-28	21.369	18.586	24.57	3.201	2.784
		Huh7-si-STAT3+IC	IFNB1	9.463	7.633	11.731	2.268	1.83
		huh7-NC-I +IC	IL-29	1	0.865654	1.1552	0.155197	0.134346
		huh7-NC-I +IC	IL-28	1	0.693687	1.44157	0.441573	0.306313
		huh7-NC-I +IC	IFNB1	1	0.78501	1.27387	0.273869	0.21499
		huh7-122-I +IC	IL-29	0.393753	0.339551	0.456609	0.0628554	0.0542029
		huh7-122-I +IC	IL-28	0.434463	0.374999	0.503356	0.0688931	0.0594639
		huh7-122-I +IC	IFNB1	0.675488	0.545563	0.836354	0.160866	0.129925
Note 1: The expression of indicated genes was presented as "fold" relative to the expression of GAPDH and normalized to the Normal liver group.
Note 2: Data presented are one experiment representative of three independent experiments (mean ± s.e.m. of technical triplicates).
