# Supplementary material for: MicroRNA-122 supports robust innate immunity in hepatocytes by targeting the RTKs/STAT3 signaling pathway
Source: eLife journal article supplement (doi:10.7554/elife.41159), 2019-02-08
Supplement: supp [file elife-41159-supp-v1.zip › elife_poa_e41159_Figure_3_source_data_9.xlsx]

## Sheet: Sheet1
Data used for illustration
		Sample Name	Target Name	RQ	RQ Max	RQ Min	RQmax-RQmean	RQmean-RQmin
		3B-NC+IC	IL-29	1	1.11562	0.896362	0.115621	0.103638
		3B-NC+IC	IL-28	1	1.05757	0.94556	0.0575748	0.0544404
		3B-NC+IC	IFNB1	1	1.1265	0.887703	0.126503	0.112297
		3B-122+IC	IL-29	6.32916	7.49171	5.34701	1.16255	0.982148
		3B-122+IC	IL-28	5.67247	6.75491	4.76349	1.08244	0.908985
		3B-122+IC	IFNB1	5.24629	6.62811	4.15255	1.38182	1.09374
		3B-si-NC+IC	IL-29	0.900452	1.12503	0.720705	0.224577	0.179747
		3B-si-NC+IC	IL-28	0.910935	1.20706	0.687459	0.296122	0.223476
		3B-si-NC+IC	IFNB1	0.776722	0.953705	0.632582	0.176984	0.14414
		3B-si-STAT3+IC	IL-29	11.5128	14.2524	9.29991	2.73951	2.21294
		3B-si-STAT3+IC	IL-28	11.1198	14.2034	8.70568	3.08358	2.41413
		3B-si-STAT3+IC	IFNB1	5.81656	6.83611	4.94907	1.01955	0.867493
Note 1: The expression of indicated genes was presented as "fold" relative to the expression of GAPDH and normalized to the Normal liver group.
Note 2: Data presented are one experiment representative of three independent experiments (mean ± s.e.m. of technical triplicates).
