# Supplementary material for: MicroRNA-122 supports robust innate immunity in hepatocytes by targeting the RTKs/STAT3 signaling pathway
Source: eLife journal article supplement (doi:10.7554/elife.41159), 2019-02-08
Supplement: supp [file elife-41159-supp-v1.zip › elife_poa_e41159_Figure_4_source_data_1.xlsx]

## Sheet: Sheet1
Data used for illustration
						upper bar	lower bar									upper bar	lower bar
	Sample Name	Target Name	RQmean	RQ Max	RQ Min	RQmax-RQmean	RQmean-RQmin	P value (T-test)			Sample Name	Target Name	RQmean	RQ Max	RQ Min	RQmax-RQmean	RQmean-RQmin	P value (T-test)
	miR-NC	IRF1	1	1.10288	0.90672	0.102876	0.0932797				si-NC	IRF1	1	1.08981	0.917588	0.089814	0.0824123
	miR-122	IRF1	0.91432	0.951612	0.87849	0.0372919	0.0358305				si-STAT3	IRF1	0.96894	1.14895	0.817134	0.180008	0.151806
	miR-NC JFH1	IRF1	0.665503	0.764127	0.579608	0.0986239	0.0858947				si-NC JFH1	IRF1	1.97644	2.29026	1.70561	0.313826	0.270824
	miR-122 JFH1	IRF1	9.93095	10.8245	9.11119	0.893515	0.819759	8.88793e-07			si-STAT3 JFH1	IRF1	12.2413	13.1119	11.4286	0.870589	0.812785	0.000423697
	miR-NC	IRF3	1	1.13281	0.882762	0.132809	0.117238				si-NC	IRF3	1	1.11572	0.896279	0.115724	0.103721
	miR-122	IRF3	1.14255	1.18878	1.09811	0.0462378	0.0444394				si-STAT3	IRF3	1.60871	1.7366	1.49024	0.127885	0.118468
	miR-NC JFH1	IRF3	0.406267	0.454802	0.36291	0.0485358	0.0433561				si-NC JFH1	IRF3	0.797738	0.844996	0.753123	0.0472579	0.0446149
	miR-122 JFH1	IRF3	1.33495	1.40369	1.26958	0.0687417	0.0653752				si-STAT3 JFH1	IRF3	1.56067	1.67144	1.45723	0.110773	0.103432
	miR-NC	NFKB1	1	1.1055	0.904568	0.1055	0.0954323				si-NC	NFKB1	1	1.03388	0.967235	0.0338753	0.0327653
	miR-122	NFKB1	1.0257	1.08081	0.973392	0.0551168	0.0523061				si-STAT3	NFKB1	1.57576	1.70236	1.45858	0.126596	0.117181
	miR-NC JFH1	NFKB1	0.450019	0.512198	0.395388	0.0621792	0.0546308				si-NC JFH1	NFKB1	0.920986	0.99559	0.851972	0.0746044	0.0690139
	miR-122 JFH1	NFKB1	1.4144	1.5037	1.3304	0.0893036	0.0839999				si-STAT3 JFH1	NFKB1	1.72014	1.9233	1.53843	0.203164	0.181703
	miR-NC	RELA	1	1.10522	0.904796	0.105222	0.0952044				si-NC	RELA	1	1.03772	0.963651	0.0377196	0.0363485
	miR-122	RELA	0.937307	0.9797	0.896748	0.0423931	0.0405587				si-STAT3	RELA	1.90095	2.01124	1.79671	0.110289	0.104241
	miR-NC JFH1	RELA	0.384604	0.43221	0.342242	0.047606	0.0423624				si-NC JFH1	RELA	0.942562	0.990392	0.897042	0.0478303	0.0455203
	miR-122 JFH1	RELA	1.06387	1.12749	1.00384	0.0636177	0.0600281				si-STAT3 JFH1	RELA	1.76963	1.84885	1.69381	0.0792194	0.075825
Note 1: The expression of indicated TFs was presented as "fold" relative to the expression of GAPDH and normalized to the indicated group.
Note 2: Data presented are one experiment representative of three independent experiments (mean ± s.e.m. of technical triplicates).
Note 3: P values were calculated by comparing the Ct values of technical replicates.
