# Supplementary material for: MicroRNA-122 supports robust innate immunity in hepatocytes by targeting the RTKs/STAT3 signaling pathway
Source: eLife journal article supplement (doi:10.7554/elife.41159), 2019-02-08
Supplement: supp [file elife-41159-supp-v1.zip › elife_poa_e41159_Figure_4_source_data_2.xlsx]

## Sheet: Sheet1
Data used for illustration
							upper bar	lower bar
		Sample Name	Target Name	RQmean	RQ Max	RQ Min	RQmax-RQmean	RQmean-RQmin
		pRFP	IL-29	1	1.71182	0.584172	0.711823	0.415828
		pRFP	IL-28	1	1.49627	0.66833	0.496267	0.33167
		pRFP	IFNB	1	1.36106	0.734722	0.361059	0.265278
		pIRF1	IL-29	30.7591	33.3763	28.3472	2.61711	2.4119
		pIRF1	IL-28	20.4578	24.1626	17.3211	3.70479	3.13674
		pIRF1	IFNB	5.06449	5.27331	4.86394	0.208819	0.20055
		pRFP	IRF1	1	1.14092	0.876483	0.140923	0.123517
		pIRF1	IRF1	565.787	580.442	551.501	14.6558	14.2858
Note 1: The expression of indicated genes was presented as "fold" relative to the expression of GAPDH and normalized to the indicated group.
Note 2: Data presented are one experiment representative of three independent experiments (mean ± s.e.m. of technical triplicates).
