# Supplementary material for: MicroRNA-122 supports robust innate immunity in hepatocytes by targeting the RTKs/STAT3 signaling pathway
Source: eLife journal article supplement (doi:10.7554/elife.41159), 2019-02-08
Supplement: supp [file elife-41159-supp-v1.zip › elife_poa_e41159_Figure_5_source_data_1.xlsx]

## Sheet: Sheet1
Data used for illustration
Fold (Flu/Rlu)		mock	exp.1	exp.2					poly(I:C)	exp.1	exp.2
			Ratio	Ratio	Mean	STDEV				Ratio	Ratio	Mean	STDEV
		basic	1	1	1	0			basic	0.886849	0.679265	0.783057	0.146784
		P1	204.737	184.335	194.536	14.4264			P1	367.592	300.766	334.179	47.2533
		P7	123.558	99.5085	111.533	17.0054			P7	331.659	210.694	271.177	85.5352
		P2	3.86964	3.55412	3.71188	0.223103			P2	2.93688	2.60407	2.77047	0.235328
		P3	3.86064	4.9921	4.42637	0.800062			P3	3.40749	4.17323	3.79036	0.541459
		P4	25.5739	18.0379	21.8059	5.32881			P4	55.5974	34.6118	45.1046	14.8391
		P5	0.270819	0.411688	0.341253	0.0996093			P5	0.264231	0.391182	0.327707	0.0897675
		P6	1.15176	0.973855	1.06281	0.125798			P6	0.766819	0.762103	0.764461	0.00333443
		P8	3.9659	3.62388	3.79489	0.241845			P8	2.32679	2.00189	2.16434	0.229738
		P9	10.5934	7.15031	8.87187	2.43466			P9	7.12979	5.0587	6.09425	1.46448
		P10	10.4127	7.80211	9.10741	1.84597			P10	15.0792	9.59857	12.3389	3.87536
		P11	7.41358	6.06465	6.73912	0.953839			P11	14.5767	9.30552	11.9411	3.7273
		mock	exp.3	exp.4					poly(I:C)	exp.3	exp.4
			Ratio	Ratio	Mean	STDEV				Ratio	Ratio	Mean	STDEV
		basic	1	1	1	0			basic	0.933654	0.977141	0.945312	0.0136666
		pGL3-control	421.983	392.476	407.23	20.8644			pGL3-control	354.127	381.345	367.736	19.2463
Note 1: The luciferase activities of IRF constructs were presented as "fold" (Flu/Rlu) and normalized to the indicated group.
Note 2: Data presented are two independent experiments (mean + s.d. of experimental repeats).
