# Supplementary material for: MicroRNA-122 supports robust innate immunity in hepatocytes by targeting the RTKs/STAT3 signaling pathway
Source: eLife journal article supplement (doi:10.7554/elife.41159), 2019-02-08
Supplement: supp [file elife-41159-supp-v1.zip › elife_poa_e41159_Figure_5_source_data_2.xlsx]

## Sheet: Sheet1
Data used for illustration
Fold (Flu/Rlu)		Raw Ratio									Normalized Ratio
				si-NC	si-STAT3	si-NC+I:C	si-STAT3+I:C
		exp.1	pGL3-control	1	0.67967	1.08524	0.644656
		exp.2	pGL3-control	1	0.614927	0.916166	0.545411
		exp.3	pGL3-control	1	0.620003	0.971638	0.609892
		Mean		1	0.6382	0.991015	0.599987
		STDEV		0	0.036004	0.0861865	0.0503585
		P value (T-test)			0.00328473		0.00519043
				si-NC	si-STAT3	si-NC+I:C	si-STAT3+I:C						si-NC	si-STAT3	si-NC+I:C	si-STAT3+I:C
		exp.1	P7	1	1.91456	1.82986	2.70353		0.67967		exp.1	P7	1	2.8169	1.82986	3.9777
		exp.2	P7	1	1.02864	1.31644	1.82298		0.614927		exp.2	P7	1	1.67278	1.91644	2.96455
		exp.3	P7	1	1.05578	1.55812	1.763		0.620003		exp.3	P7	1	1.70287	1.55812	2.84353
											Mean		1	2.06418	1.76814	3.26193
											STDEV		0	0.652044	0.186961	0.622824
											P value (T-test)			0.105674		0.0437432
				si-NC	si-STAT3	si-NC+I:C	si-STAT3+I:C						si-NC	si-STAT3	si-NC+I:C	si-STAT3+I:C
		exp.1	P1	1	1.44868	1.4253	1.8584		0.67967		exp.1	P1	1	2.13145	1.4253	2.73426
		exp.2	P1	1	1.27658	1.25359	1.63049		0.614927		exp.2	P1	1	2.07599	1.25359	2.65152
		exp.3	P1	1	0.784158	1.46825	1.59773		0.620003		exp.3	P1	1	1.26477	1.46825	2.57697
											Mean		1	1.82407	1.38238	2.65425
											STDEV		0	0.485161	0.113588	0.0786797
											P value (T-test)			0.098725		0.000193936
				si-NC	si-STAT3	si-NC+I:C	si-STAT3+I:C						si-NC	si-STAT3	si-NC+I:C	si-STAT3+I:C
		exp.1	P4	1	1.00685	1.82697	1.93349		0.67967		exp.1	P4	1	1.48138	1.82697	2.84475
		exp.2	P4	1	1.015	2.30093	1.97492		0.614927		exp.2	P4	1	1.6506	1.97492	3.21164
		exp.3	P4	1	0.893272	2.14516	2.32062		0.620003		exp.3	P4	1	1.44076	2.14516	3.74291
											Mean		1	1.52425	1.98235	3.26643
											STDEV		0	0.111297	0.159225	0.45158
											P value (T-test)			0.0146933		0.0280396
Note 1: The luciferase activities of IRF constructs were presented as "fold" (Flu/Rlu) and normalized to the indicated group.
Note 2: Data presented are three independent experiments (mean + s.d. of experimental repeats).
Note 3: P values were calculated by comparing the "ratio" of experimental repeats.
