# Supplementary material for: MicroRNA-122 supports robust innate immunity in hepatocytes by targeting the RTKs/STAT3 signaling pathway
Source: eLife journal article supplement (doi:10.7554/elife.41159), 2019-02-08
Supplement: supp [file elife-41159-supp-v1.zip › elife_poa_e41159_Figure_5_source_data_3.xlsx]

## Sheet: Sheet1
Data used for illustration
Fold (Flu/Rlu)				exp.1	exp.2	exp.3	exp.4
				Ratio	Ratio	Ratio	Ratio	Mean	STDEV	P value (T-test)
		IRF1-P1	RFP	1	1	1	1	1	0
		IRF1-P1	STAT3	0.670911	0.532536	0.634149	0.676332	0.628482	0.0666524	0.00154685
		IRF1-P7	RFP	1	1	1	1	1	0
		IRF1-P7	STAT3	0.685213	0.690471	0.825161	0.779017	0.744965	0.0686315	0.00504137
		IRF1-P4	RFP	1	1	1	1	1	0
		IRF1-P4	STAT3	0.880767	0.832504	0.676505	0.639589	0.757341	0.117308	0.0256339
		pGL3-control	RFP	1	1	1	1	1	0
		pGL3-control	STAT3	1.22969	0.938667	0.975636	0.865638	1.00241	0.158265	0.977632
Note 1: The luciferase activities of IRF constructs were presented as "fold" (Flu/Rlu) and normalized to the indicated group.
Note 2: Data presented are four independent experiments (mean + s.d. of experimental repeats).
Note 3: P values were calculated by comparing the "ratio" of experimental repeats.
