# Supplementary material for: MicroRNA-122 supports robust innate immunity in hepatocytes by targeting the RTKs/STAT3 signaling pathway
Source: eLife journal article supplement (doi:10.7554/elife.41159), 2019-02-08
Supplement: supp [file elife-41159-supp-v1.zip › elife_poa_e41159_Figure_5_source_data_4.xlsx]

## Sheet: Sheet1
Data used for illustration
													Normalized Ratio
Fold (Flu/Rlu)
															si-NC	si-STAT3	si-NC+I:C	si-STAT3+I:C
			exp.1	exp.2	exp.3			P value (T-test)	P value (T-test)				exp.1	P1-M	1	1.96848	1.20318	1.99693
			Ratio	Ratio	Ratio	Mean	STDEV	mock vs poly(I:C)	WT vs MU				exp.2	P1-M	1	1.37595	0.753028	1.22746
	mock	P1	1	1	1	1	0						exp.3	P1-M	1	1.00192	1.07394	1.49811
	poly(I:C), 24h	P1	1.7032	1.93326	2.22202	1.95283	0.25996	0.0239253					Mean		1	1.44879	1.01005	1.57417
	mock	P1-M	0.351488	0.30139	0.563943	0.405607	0.139392		0.0178427				STDEV		0	0.487381	0.231775	0.390333
	poly(I:C), 24h	P1-M	0.391412	0.652452	0.784326	0.609397	0.199964	0.22929	0.00264165				P value (T-test)			0.251784		0.113376
	mock	P4	1	1	1	1	0								si-NC	si-STAT3	si-NC+I:C	si-STAT3+I:C
	poly(I:C), 24h	P4	2.54003	1.82697	2.30093	2.22264	0.362918	0.0281359					exp.1	P4-M	1	1.35575	2.55549	4.56052
	mock	P4-M	0.802612	0.784326	0.719859	0.768933	0.0434709		0.011593				exp.2	P4-M	1	1.44096	3.24893	5.88224
	poly(I:C), 24h	P4-M	3.93744	4.15367	2.81621	3.63577	0.71795	0.0199571	0.0567479				exp.3	P4-M	1	1.25342	2.8475	7.56676
													Mean		1	1.35004	2.88397	6.00318
													STDEV		0	0.093901	0.348157	1.50676
													P value (T-test)			0.0231572		0.0630689
Note 1: The luciferase activities of IRF constructs were presented as "fold" (Flu/Rlu) and normalized to the indicated group.
Note 2: Data presented are three independent experiments (mean + s.d. of experimental repeats).
Note 3: P values were calculated by comparing the "ratio" of experimental repeats.
