# Supplementary material for: MicroRNA-122 supports robust innate immunity in hepatocytes by targeting the RTKs/STAT3 signaling pathway
Source: eLife journal article supplement (doi:10.7554/elife.41159), 2019-02-08
Supplement: supp [file elife-41159-supp-v1.zip › elife_poa_e41159_Figure_5_source_data_5.xlsx]

## Sheet: Sheet1
Data used for illustration
Fold (Flu/Rlu)				exp.1	exp.2	exp.3
				Ratio	Ratio	Ratio	Mean	STDEV	P value (T-test)
		IRF1-P1	RFP	1	1	1	1	0
		IRF1-P1	STAT3	0.634149	0.813728	0.676332	0.70807	0.0939023
		IRF1-P1-M	RFP	1.35223	1.71901	1.71991	1.59705	0.21202	0.0395576
		IRF1-P1-M	STAT3	1.06996	1.45747	1.17818	1.2352	0.199949	0.0285266
		IRF1-P4	RFP	1	1	1	1	0
		IRF1-P4	STAT3	0.832504	0.676505	0.639589	0.716199	0.1024
		IRF1-P4-M	RFP	1.75954	1.76293	1.43641	1.65296	0.187544	0.0264141
		IRF1-P4-M	STAT3	1.48284	1.27775	1.00862	1.2564	0.237828	0.0427729
Note 1: The luciferase activities of IRF constructs were presented as "fold" (Flu/Rlu) and normalized to the indicated group.
Note 2: Data presented are three independent experiments (mean + s.d. of experimental repeats).
Note 3: P values were calculated by comparing the "ratio" of experimental repeats.
