# Supplementary material for: MicroRNA-122 supports robust innate immunity in hepatocytes by targeting the RTKs/STAT3 signaling pathway
Source: eLife journal article supplement (doi:10.7554/elife.41159), 2019-02-08
Supplement: supp [file elife-41159-supp-v1.zip › elife_poa_e41159_Figure_5_source_data_6.xlsx]

## Sheet: Sheet1
Data used for illustration
ChIP-qPCR							upper bar	lower bar
		Sample Name	Target Name	RQmean	RQmax	RQmin	RQmax-RQmean	RQmean-RQmin
		si-NC IgG	BS1′	1	1.35152	0.73991	0.351516	0.26009
		si-P65 IgG	BS1′	1	1.5813	0.632391	0.581301	0.367609
		si-STAT3 IgG	BS1′	1	1.44347	0.692776	0.443468	0.307224
		si-NC STAT3	BS1′	14.1562	18.8424	10.6355	4.68621	3.52073
		si-P65 STAT3	BS1′	4.67151	7.07822	3.08312	2.40671	1.58839
		si-STAT3 STAT3	BS1′	8.12355	11.2276	5.87767	3.10404	2.24588
		si-NC IgG	BS4′	1	1.4384	0.695219	0.438396	0.304781
		si-P65 IgG	BS4′	1	1.52895	0.654044	0.528949	0.345956
		si-STAT3 IgG	BS4′	1	1.54702	0.646403	0.547022	0.353597
		si-NC STAT3	BS4′	25.6999	33.5286	19.6992	7.82866	6.00073
		si-P65 STAT3	BS4′	18.4536	27.0944	12.5685	8.64076	5.8851
		si-STAT3 STAT3	BS4′	10.1923	13.7433	7.55879	3.55104	2.63351
Note 1: The amount of ChIP DNAs was firstly normalized to that of input DNAs and then further normalized to that of IgG groups.
Note 2: Data presented are one experiment representative of three independent experiments (mean ± s.e.m. of technical triplicates).
