# Supplementary material for: MicroRNA-122 supports robust innate immunity in hepatocytes by targeting the RTKs/STAT3 signaling pathway
Source: eLife journal article supplement (doi:10.7554/elife.41159), 2019-02-08
Supplement: supp [file elife-41159-supp-v1.zip › elife_poa_e41159_Figure_5_source_data_7.xlsx]

## Sheet: Sheet1
Data used for illustration
Fold (Flu/Rlu)				exp.1	exp.2	exp.3
				Ratio	Ratio	Ratio	Mean	STDEV	P value (T-test)
		IRF1-P1	RFP	1	1	1	1	0
		IRF1-P1	IRF1	1.11782	1.1677	1.18972	1.15841	0.0368427
		IRF1-P1	P65	4.39636	3.68998	4.0813	4.05588	0.353875
		IRF1-P1-M	RFP	1.58971	1.35223	1.71901	1.55365	0.186028
		IRF1-P1-M	IRF1	0.885599	1.03961	1.10856	1.01126	0.114155
		IRF1-P1-M	P65	6.15183	5.50277	6.65238	6.10232	0.576402	0.0104427
		IRF1-P4	RFP	1	1	1	1	0
		IRF1-P4	IRF1	3.2839	3.73142	2.94439	3.3199	0.39475
		IRF1-P4	P65	3.82842	3.88952	3.62901	3.78232	0.136239
		IRF1-P4-M	RFP	1.78576	1.75954	1.76293	1.76941	0.0142645
		IRF1-P4-M	IRF1	4.56814	5.3715	4.61712	4.85226	0.45035	0.011851
		IRF1-P4-M	P65	2.48177	2.17517	3.07774	2.57823	0.458949
Note 1: The luciferase activities of IRF constructs were presented as "fold" (Flu/Rlu) and normalized to the indicated group.
Note 2: Data presented are three independent experiments (mean + s.d. of experimental repeats).
Note 3: P values were calculated by comparing the "ratio" of experimental repeats.
