# Supplementary material for: MicroRNA-122 supports robust innate immunity in hepatocytes by targeting the RTKs/STAT3 signaling pathway
Source: eLife journal article supplement (doi:10.7554/elife.41159), 2019-02-08
Supplement: supp [file elife-41159-supp-v1.zip › elife_poa_e41159_Figure_6_figure_supplement_2.pdf]

## Figure 6-figure supplement 2

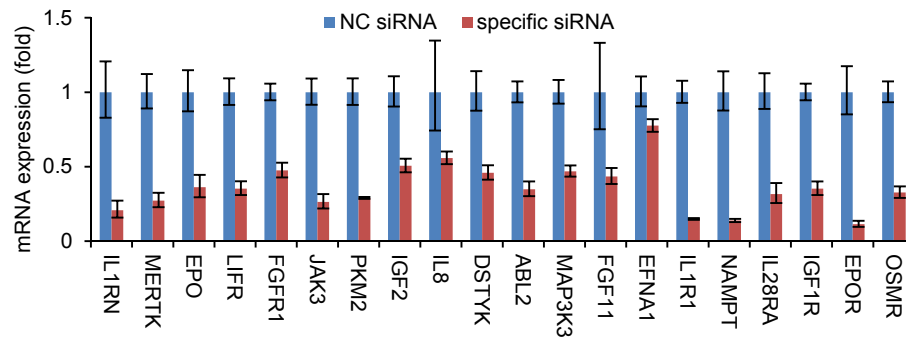

**Figure 6-figure supplement 2.** qRT-PCR analysis of the effectiveness of siRNAs on the corresponding genes. The expression of each gene was normalized to its level in si-NC-treated cells. qRT-PCR data are one experiment representative of two independent experiments (mean  $\pm$  SEM of technical triplicates).
