# Supplementary material for: MicroRNA-122 supports robust innate immunity in hepatocytes by targeting the RTKs/STAT3 signaling pathway
Source: eLife journal article supplement (doi:10.7554/elife.41159), 2019-02-08
Supplement: supp [file elife-41159-supp-v1.zip › elife_poa_e41159_Figure_6_figure_supplement_3.pdf]

**Figure 6-figure supplement 3**

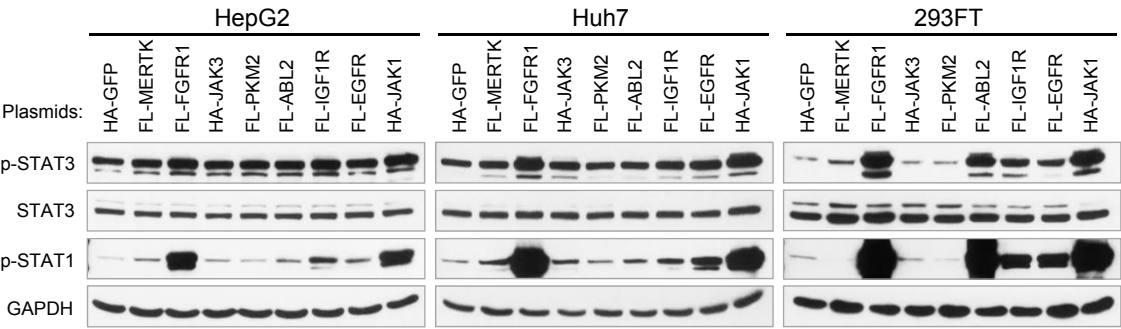

**Figure 6-figure supplement 3.** The effects of 8 tyrosine kinases on the phosphorylation of STAT3 and STAT1. Cells were transfected with indicated plasmids for 2 days. HA-GFP was employed as a negative control.
