# Supplementary material for: MicroRNA-122 supports robust innate immunity in hepatocytes by targeting the RTKs/STAT3 signaling pathway
Source: eLife journal article supplement (doi:10.7554/elife.41159), 2019-02-08
Supplement: supp [file elife-41159-supp-v1.zip › elife_poa_e41159_Figure_6_source_data_1.xlsx]

## Sheet: Sheet1
Data used for illustration
		Sample Name	Target Name	RQmean	RQmax	RQmin	RQmax-RQmean	RQmean-RQmin
		HepG2	miR-122	0.0169224	0.0177088	0.0161709	0.000786405	0.000751483
		G2/122-OFF	miR-122	1	1.12873	0.885951	0.128731	0.114049
		G2/122-ON	miR-122	299.288	369.185	242.624	69.8973	56.6638
		Huh7	miR-122	17.9872	22.0403	14.6794	4.05317	3.3078
Note 1: The expression of miR-122 was presented as "fold" relative to the expression of U6 and normalized to the indicated group.
Note 2: Data presented are one experiment representative of two independent experiments (mean ± s.e.m. of technical triplicates).
