# Supplementary material for: MicroRNA-122 supports robust innate immunity in hepatocytes by targeting the RTKs/STAT3 signaling pathway
Source: eLife journal article supplement (doi:10.7554/elife.41159), 2019-02-08
Supplement: supp [file elife-41159-supp-v1.zip › elife_poa_e41159_Figure_6_source_data_2.xlsx]

## Sheet: Sheet1
Data used for illustration
			miR-NC								miR-122
		Target Name	RQmean	RQmax	RQmin	RQmax-RQmean	RQmean-RQmin			Target Name	RQmean	RQmax	RQmin	RQmax-RQmean	RQmean-RQmin
		IL1RN	1	1.2861	0.777545	0.286098	0.222455			IL1RN	0.280124	0.315592	0.248642	0.0354683	0.0314821
		MERTK	1	1.04173	0.959941	0.0417302	0.0400586			MERTK	0.360724	0.366453	0.355085	0.00572839	0.00563884
		EPO	1	1.1341	0.881753	0.134104	0.118247			EPO	0.403275	0.518293	0.313782	0.115018	0.0894936
		LIFR	1	1.07349	0.931539	0.0734925	0.0684611			LIFR	0.407683	0.518847	0.320336	0.111165	0.0873473
		FGFR1	1	1.05664	0.946398	0.0566376	0.0536017			FGFR1	0.461977	0.46658	0.45742	0.00460288	0.00455746
		JAK3	1	1.0577	0.945451	0.057696	0.0545487			JAK3	0.463968	0.587711	0.36628	0.123743	0.0976887
		PKM2	1	1.03545	0.965762	0.0354521	0.0342383			PKM2	0.466048	0.491152	0.442226	0.0251045	0.0238214
		IGF2	1	1.15831	0.863328	0.158309	0.136672			IGF2	0.46749	0.486753	0.448989	0.0192633	0.018501
		IL8	1	1.02055	0.979863	0.020551	0.0201371			IL8	0.469955	0.502647	0.439391	0.0326911	0.0305649
		DSTYK	1	1.06414	0.939725	0.0641413	0.0602751			DSTYK	0.512823	0.538999	0.487918	0.026176	0.0249048
		ABL2	1	1.02948	0.971361	0.0294829	0.0286385			ABL2	0.547768	0.623399	0.481312	0.0756312	0.0664556
		MAP3K3	1	1.03065	0.970264	0.0306473	0.0297359			MAP3K3	0.557951	0.61595	0.505413	0.0579993	0.052538
		FGF11	1	1.09883	0.91006	0.0988286	0.0899399			FGF11	0.564842	0.653912	0.487905	0.0890695	0.0769373
		EFNA1	1	1.03655	0.964743	0.0365457	0.0352572			EFNA1	0.572181	0.595238	0.550016	0.0230577	0.0221645
		IL1R1	1	1.02966	0.971191	0.0296634	0.0288089			IL1R1	0.573274	0.596586	0.550873	0.0233119	0.022401
		NAMPT	1	1.03922	0.962259	0.0392214	0.0377411			NAMPT	0.575288	0.678948	0.487454	0.103661	0.0878339
		IL28RA	1	1.03166	0.969313	0.0316583	0.0306868			IL28RA	0.657063	0.684765	0.630482	0.0277019	0.0265812
		IGF1R	1	1.08751	0.919534	0.0875077	0.0804663			IGF1R	0.763654	0.770682	0.756689	0.0070284	0.00696433
		EPOR	1	1.01703	0.983253	0.0170324	0.0167472			EPOR	0.774171	0.82742	0.72435	0.0532482	0.0498215
		OSMR	1	1.01599	0.984263	0.0159883	0.0157367			OSMR	0.830589	0.853104	0.808667	0.0225156	0.0219213
Note 1: The expression of indicated genes was presented as "fold" relative to the expression of GAPDH and normalized to the NC groups.
Note 2: Data presented are one experiment representative of three independent experiments (mean ± s.e.m. of technical triplicates).
