# Supplementary material for: MicroRNA-122 supports robust innate immunity in hepatocytes by targeting the RTKs/STAT3 signaling pathway
Source: eLife journal article supplement (doi:10.7554/elife.41159), 2019-02-08
Supplement: supp [file elife-41159-supp-v1.zip › elife_poa_e41159_Figure_6_source_data_3.xlsx]

## Sheet: Sheet1
Data used for illustration
			NC siRNA							specific siRNA
		Target Name	RQmean	RQmax	RQmin	RQmax-RQmean	RQmean-RQmin		Target Name	RQmean	RQmax	RQmin	RQmax-RQmean	RQmean-RQmin
		IL1RN	1	1.20747	0.828179	0.207469	0.171821		IL1RN	0.207048	0.272179	0.157503	0.0651309	0.0495455
		MERTK	1	1.12255	0.890829	0.12255	0.109171		MERTK	0.272184	0.324595	0.228236	0.052411	0.0439484
		EPO	1	1.14758	0.871401	0.147577	0.128599		EPO	0.362019	0.445355	0.294278	0.0833354	0.0677415
		LIFR	1	1.09355	0.914454	0.0935485	0.0855458		LIFR	0.352445	0.40161	0.3093	0.0491645	0.0431458
		FGFR1	1	1.05784	0.945321	0.0578419	0.0546792		FGFR1	0.474903	0.52695	0.427996	0.0520474	0.0469067
		JAK3	1	1.09232	0.915485	0.0923171	0.0845149		JAK3	0.263183	0.315606	0.219467	0.0524234	0.0437157
		PKM2	1	1.09348	0.914508	0.0934847	0.0854925		PKM2	0.289962	0.296731	0.283348	0.00676908	0.00661466
		IGF2	1	1.10695	0.903386	0.106947	0.0966141		IGF2	0.505753	0.55369	0.461967	0.0479366	0.0437864
		IL8	1	1.34646	0.74269	0.346457	0.25731		IL8	0.557717	0.601739	0.516916	0.0440217	0.0408011
		DSTYK	1	1.14141	0.876106	0.141415	0.123894		DSTYK	0.458387	0.509663	0.412269	0.0512764	0.0461176
		ABL2	1	1.07314	0.931847	0.0731379	0.0681533		ABL2	0.347826	0.40091	0.30177	0.0530845	0.0460556
		MAP3K3	1	1.08257	0.923725	0.0825735	0.0762752		MAP3K3	0.468988	0.507921	0.433039	0.0389334	0.035949
		FGF11	1	1.33189	0.750815	0.331886	0.249185		FGF11	0.43403	0.490901	0.383748	0.0568703	0.0502819
		EFNA1	1	1.10552	0.904549	0.105523	0.0954509		EFNA1	0.775527	0.8194	0.734003	0.0438733	0.0415242
		IL1R1	1	1.07641	0.929011	0.0764134	0.0709889		IL1R1	0.148417	0.154626	0.142457	0.00620892	0.00595961
		NAMPT	1	1.14043	0.87686	0.140433	0.12314		NAMPT	0.138075	0.149657	0.127389	0.0115823	0.010686
		IL28RA	1	1.12696	0.887341	0.126962	0.112659		IL28RA	0.31565	0.38961	0.25573	0.0739596	0.0599199
		IGF1R	1	1.05714	0.94595	0.0571378	0.0540496		IGF1R	0.351976	0.400872	0.309044	0.0488962	0.0429321
		EPOR	1	1.17479	0.851218	0.174787	0.148782		EPOR	0.114029	0.13627	0.095417	0.0222419	0.0186116
		OSMR	1	1.07227	0.932601	0.0722698	0.0673989		OSMR	0.326606	0.367255	0.290456	0.040649	0.0361498
Note 1: The expression of indicated genes was presented as "fold" relative to the expression of GAPDH and normalized to the NC siRNA-treated group.
Note 2: Data presented are one experiment representative of two independent experiments (mean ± s.e.m. of technical triplicates).
