# Supplementary material for: MicroRNA-122 supports robust innate immunity in hepatocytes by targeting the RTKs/STAT3 signaling pathway
Source: eLife journal article supplement (doi:10.7554/elife.41159), 2019-02-08
Supplement: supp [file elife-41159-supp-v1.zip › elife_poa_e41159_Figure_6_source_data_4.xlsx]

## Sheet: Sheet1
Data used for illustration
			Target Name	RQmean	RQmax	RQmin	RQmax-RQmean	RQmean-RQmin
		STAT3	IFNB1	7.73388	9.52152	6.28187	1.78763	1.45201
			IL28	22.5313	23.7104	21.4109	1.17908	1.12044
			IL29	12.6691	13.4039	11.9747	0.734731	0.694457
		NC	IFNB1	1	1.42137	0.703545	0.421373	0.296455
			IL28	1	1.22159	0.818606	0.221589	0.181394
			IL29	1	1.12471	0.889117	0.124712	0.110883
		MERTK	IFNB1	2.76635	3.07164	2.49139	0.305295	0.274951
			IL28	5.43952	5.88454	5.02816	0.445016	0.411361
			IL29	4.37102	4.92576	3.87875	0.554745	0.492269
		EPO	IFNB1	2.73888	3.43327	2.18493	0.694393	0.553949
			IL28	12.104	15.4778	9.46558	3.37379	2.63838
			IL29	7.09517	8.40497	5.98948	1.30981	1.10569
		JAK3	IFNB1	3.3523	3.71899	3.02177	0.366689	0.330534
			IL28	7.85435	9.1075	6.77363	1.25315	1.08072
			IL29	5.43325	6.12995	4.81572	0.696706	0.617521
		PKM2	IFNB1	1.51152	2.36859	0.964582	0.857069	0.546941
			IL28	1.60489	1.96333	1.31189	0.358439	0.293
			IL29	1.23354	1.45058	1.04897	0.217038	0.184565
		IGF2	IFNB1	2.65082	2.98104	2.35717	0.330222	0.293642
			IL28	2.86154	3.11808	2.62611	0.25654	0.235433
			IL29	2.21928	2.39233	2.05874	0.173054	0.160536
		IL8	IFNB1	6.38516	7.09516	5.74622	0.709995	0.638948
			IL28	11.8455	13.0422	10.7585	1.19678	1.08696
			IL29	9.3578	10.0632	8.70187	0.705363	0.655921
		MAP3K3	IFNB1	2.26524	2.99426	1.71372	0.729018	0.551522
			IL28	2.02761	2.34003	1.7569	0.312425	0.270712
			IL29	1.06525	1.19782	0.947347	0.132573	0.1179
		FGF11	IFNB1	16.8666	18.8696	15.0763	2.00294	1.79033
			IL28	37.8834	39.7622	36.0934	1.87876	1.78999
			IL29	31.3588	33.0138	29.7868	1.65497	1.572
		IL28RA	IFNB1	8.43603	9.70917	7.32984	1.27314	1.10619
			IL28	40.3807	47.7287	34.1639	7.34803	6.21677
			IL29	16.4904	18.9065	14.3831	2.41608	2.10732
Note 1: The expression of IFNs was presented as "fold" relative to the expression of GAPDH and normalized to the NC groups.
Note 2: Data presented are one experiment representative of three independent experiments (mean ± s.e.m. of technical triplicates).
