# Supplementary material for: MicroRNA-122 supports robust innate immunity in hepatocytes by targeting the RTKs/STAT3 signaling pathway
Source: eLife journal article supplement (doi:10.7554/elife.41159), 2019-02-08
Supplement: supp [file elife-41159-supp-v1.zip › elife_poa_e41159_Figure_7_figure_supplement_2.pdf]

## Figure 7-figure supplement 2

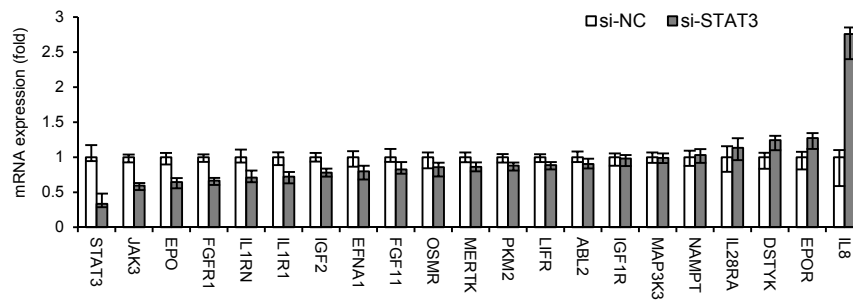

**Figure 7-figure supplement 2.** qRT-PCR analysis of the effects of STAT3 knockdown on the expression of 20 genes in HepG2 cells transfected with 20 nM siRNAs (NC or STAT3) for 2 days. Data are one experiment representative of two independent experiments (mean  $\pm$  SEM of technical triplicates).
