# Supplementary material for: MicroRNA-122 supports robust innate immunity in hepatocytes by targeting the RTKs/STAT3 signaling pathway
Source: eLife journal article supplement (doi:10.7554/elife.41159), 2019-02-08
Supplement: supp [file elife-41159-supp-v1.zip › elife_poa_e41159_Figure_7_source_data_1.xlsx]

## Sheet: Sheet1
Data used for illustration
Fold (Rlu/Flu)		wild-type	Ratio: miR-122/miR-neg						Mutant	Ratio: miR-122/miR-neg					Ratio(WT/Mut)	P value
			exp.1	exp.2	exp.3					exp.1	exp.2	exp.3
		Constructs	Ratio	Ratio	Ratio	Mean	STDEV		Constructs	Ratio	Ratio	Ratio	Mean	STDEV
		IL1RN	0.615896	0.483192	0.673695	0.590928	0.0976752		IL1RN	1.0951	1.10361	1.08552	1.09474	0.00904662	0.539787	0.0117605
		MERTK_S1	0.503476	0.558699	0.614642	0.558939	0.0555833		MERTK_S1	0.810254	0.821531	0.839834	0.823873	0.0149288	0.678428	0.0102658
		MERTK_S2	0.80782	0.915337	0.919936	0.881031	0.063444		MERTK_S2	1.10608	0.909954	0.909155	0.975063	0.113464	0.903563	0.29546
		EPO	0.839248	0.777362	0.823117	0.813243	0.0321029		EPO	0.98696	1.13938	1.00736	1.04457	0.0827415	0.778544	0.027646
		FGFR1_S1	1.12731	0.915209	0.948574	0.99703	0.11405		FGFR1_S1	1.10749	0.917407	0.873789	0.966228	0.124263	1.03188	0.767699
		FGFR1_S2	0.68968	0.679708	0.701769	0.690385	0.0110473		FGFR1_S2	0.862729	0.898158	0.856735	0.872541	0.0223868	0.791235	0.00122018
		JAK3 _S1	0.918122	0.791775	0.995735	0.901877	0.102946		JAK3 _S1	1.07813	1.08126	1.05678	1.07206	0.0133191	0.841259	0.101042
		JAK3_S2	0.97339	0.905412	1.08565	0.98815	0.0910203		JAK3_S2	1.01892	1.06883	1.23307	1.10694	0.112044	0.892687	0.230052
		PKM2	0.33066	0.309758	0.336914	0.325777	0.0142211		PKM2	0.928971	0.870474	0.843184	0.880876	0.0438295	0.369833	0.000868679
		IGF2_S1	0.867626	0.730906	0.638697	0.745743	0.115183		IGF2_S1	0.825347	0.859015	0.806876	0.830413	0.0264363	0.898039	0.330124
		IGF2_S2	0.783812	0.853084	0.813196	0.816697	0.0347685		IGF2_S2	0.836515	0.866852	0.873808	0.859058	0.0198305	0.950689	0.159025
		DSTYK_S1	0.889088	1.03638	0.845527	0.923664	0.100013		DSTYK_S1	1.07005	0.941543	0.974957	0.995515	0.0666727	0.927825	0.366933
		DSTYK_S2	0.448994	0.546499	0.522275	0.505923	0.0507677		DSTYK_S2	1.01384	0.991846	1.11	1.03856	0.0628355	0.487138	0.000424308
		ABL2_S1	0.936236	0.962919	0.847098	0.915418	0.060652		ABL2_S1	1.0353	0.965273	0.946774	0.982451	0.0466978	0.93177	0.208452
		ABL2_S2	1.00184	0.899293	1.00583	0.968987	0.0603905		ABL2_S2	1.00234	1.13645	1.07875	1.07251	0.0672746	0.903473	0.119148
		MAP3K3	0.460905	0.552275	0.453	0.488726	0.055176		MAP3K3	0.989149	1.0462	0.956	0.997117	0.0456262	0.490139	0.000306293
		FGF11_S1	0.660042	0.704564	0.618507	0.661038	0.0430371		FGF11_S1	0.871975	0.865756	0.854707	0.864146	0.0087459	0.764961	0.0120348
		FGF11_S2	0.714187	0.700073	0.684496	0.699586	0.0148516		FGF11_S2	0.85349	0.829299	0.8396	0.840796	0.0121398	0.832051	0.000273682
		EFNA1	0.877551	0.714797	0.931402	0.84125	0.112773		EFNA1	1.04998	0.916572	0.845526	0.93736	0.103801	0.897468	0.338901
		IL1R1	0.969997	0.924687	0.870246	0.921643	0.0499451		IL1R1	1.04802	1.04983	1.02806	1.04197	0.0120831	0.884518	0.0461785
		IGF1R _S1	0.349096	0.421551	0.368699	0.379782	0.0374772		IGF1R _S1	0.726965	0.770177	0.788564	0.761902	0.0316224	0.498466	0.000206723
		IGF1R_S2	0.530756	0.574224	0.560896	0.555292	0.0222693		IGF1R_S2	0.806965	0.838388	0.816671	0.820675	0.0160893	0.676629	0.000141389
		OSMR	0.78177	0.702418	0.946092	0.810093	0.124282		OSMR	1.16981	0.949483	0.943917	1.02107	0.128843	0.793377	0.110871
Note 1: The luciferase activities of constructs were presented as "fold" (Rlu/Flu) and normalized to the miR-neg groups.
Note 2: Data presented are three independent experiments (mean + s.d. of experimental repeats).
Note 2: Data presented are three independent experiments (mean + s.d. of experimental repeats).
