# Supplementary material for: MicroRNA-122 supports robust innate immunity in hepatocytes by targeting the RTKs/STAT3 signaling pathway
Source: eLife journal article supplement (doi:10.7554/elife.41159), 2019-02-08
Supplement: supp [file elife-41159-supp-v1.zip › elife_poa_e41159_Figure_7_source_data_2.xlsx]

## Sheet: Sheet1
Data used for illustration
		Normal liver						HepG2						Huh7
					upper bar	lower bar					upper bar	lower bar					upper bar	lower bar
	Target Name	RQmean	RQ Max	RQ Min	RQmax-RQmean	RQmean-RQmin		RQmean	RQ Max	RQ Min	RQmax-RQmean	RQmean-RQmin		RQmean	RQ Max	RQ Min	RQmax-RQmean	RQmean-RQmin
	IL1RN	1	1.28797	0.776418	0.287966	0.223582		0.108902	0.126902	0.0934549	0.0180001	0.0154469		6.9075e-05	0.0001258	3.79282e-05	5.67246e-05	3.11468e-05
	MERTK	1	1.04911	0.953188	0.0491112	0.0468122		2.13931	2.40988	1.89912	0.27057	0.240192		0.14144	0.148718	0.134518	0.0072781	0.00692191
	EPO	1	1.05641	0.946601	0.0564113	0.053399		0.0600887	0.0706786	0.0510855	0.0105899	0.00900317		0.0015787	0.00202032	0.00123362	0.000441616	0.000345084
	LIFR	1	1.04624	0.955806	0.0462378	0.0441943		0.386383	0.438965	0.3401	0.0525817	0.0462832		0.534461	0.580501	0.492072	0.0460406	0.042389
	FGFR1	1	1.14204	0.87563	0.142035	0.12437		6.53974	7.47648	5.72036	0.936747	0.819379		0.352352	0.369357	0.336129	0.0170056	0.0162226
	JAK3	1	1.06132	0.942219	0.061324	0.0577807		0.811247	0.912226	0.721446	0.100979	0.0898011		0.0020638	0.0023916	0.00178092	0.000327801	0.000282872
	PKM2	1	1.0674	0.936852	0.0674047	0.0631482		8.3818	9.43712	7.4445	1.05532	0.937308		5.49384	5.8837	5.12982	0.389858	0.364026
	IGF2	1	1.05538	0.947529	0.0553768	0.0524711		3.35601	3.78061	2.9791	0.424598	0.376911		0.647895	0.68095	0.616444	0.0330554	0.0314508
	IL8	1	1.05823	0.94497	0.0582346	0.0550299		0.0999202	0.116131	0.0859723	0.0162108	0.0139479		1.35282	1.43015	1.27967	0.0773316	0.0731501
	DSTYK	1	1.04666	0.955423	0.0466573	0.0445774		0.630063	0.712806	0.556925	0.082743	0.0731382		0.703322	2.26668	0.218232	1.56336	0.48509
	ABL2	1	1.03891	0.962544	0.0389131	0.0374556		1.38056	1.55453	1.22605	0.173976	0.154505		0.716913	0.761206	0.675198	0.0442927	0.0417154
	MAP3K3	1	1.03567	0.96556	0.035668	0.0344396		0.87382	0.988417	0.77251	0.114597	0.10131		0.191938	0.21043	0.175071	0.0184922	0.0168672
	FGF11	1	1.14114	0.876316	0.141141	0.123684		4.42366	5.16348	3.78984	0.73982	0.633819		0.802862	0.936287	0.688452	0.133424	0.114411
	EFNA1	1	1.08091	0.925148	0.0809082	0.0748521		0.175902	0.202494	0.152801	0.0265928	0.0231004		0.0615763	0.0680398	0.0557268	0.00646349	0.00584949
	IL1R1	1	1.03168	0.969296	0.0316766	0.030704		0.279572	0.314987	0.248139	0.0354146	0.0314329		0.056053	0.059208	0.0530661	0.00315503	0.00298691
	NAMPT	1	1.10336	0.90632	0.103363	0.0936796		0.0505735	0.0569658	0.0448986	0.00639222	0.00567494		0.029149	0.0328608	0.0258566	0.00371174	0.00329249
	IL28RA	1	1.14464	0.873635	0.144643	0.126365		0.580269	0.656705	0.51273	0.0764359	0.0675393		0.572764	0.629395	0.521228	0.0566316	0.051536
	IGF1R	1	1.05668	0.946364	0.0566762	0.0536363		20.763	23.6808	18.2047	2.91781	2.5583		10.3326	11.2095	9.52431	0.876881	0.808285
	EPOR	1	1.1216	0.89158	0.121605	0.10842		0.345067	0.392425	0.303425	0.0473575	0.0416424		0.455194	0.480598	0.431133	0.0254041	0.0240612
	OSMR	1	1.15003	0.869545	0.150027	0.130455		0.427416	0.4829	0.378307	0.0554839	0.0491089		0.133927	0.148686	0.120634	0.0147588	0.0132938
Note 1: The expression of indicated genes was presented as "fold" relative to the expression of GAPDH and normalized to the Normal liver group.
Note 2: Data presented are one experiment representative of three independent experiments (mean ± s.e.m. of technical triplicates).
