# Supplementary material for: MicroRNA-122 supports robust innate immunity in hepatocytes by targeting the RTKs/STAT3 signaling pathway
Source: eLife journal article supplement (doi:10.7554/elife.41159), 2019-02-08
Supplement: supp [file elife-41159-supp-v1.zip › elife_poa_e41159_Figure_7_source_data_3.xlsx]

## Sheet: Figure S9
Data used for illustration
		si-NC						si-STAT3
					upper bar	lower bar					upper bar	lower bar
	Target Name	RQmean	RQ Max	RQ Min	RQmax-RQmean	RQmean-RQmin		RQmean	RQ Max	RQ Min	RQmax-RQmean	RQmean-RQmin
	STAT3	1	0.852323	1.17326	0.173264	0.147677		0.334361	0.287557	0.388783	0.054422	0.046804
	JAK3	1	0.963628	1.03774	0.0377448	0.0363719		0.59516	0.530514	0.667683	0.0725237	0.0646461
	EPO	1	0.942234	1.06131	0.0613077	0.0577662		0.644703	0.55623	0.747249	0.102546	0.0884734
	FGFR1	1	0.96123	1.04033	0.0403341	0.0387703		0.665137	0.604896	0.731378	0.066241	0.0602415
	IL1RN	1	0.901344	1.10945	0.109454	0.098656		0.710447	0.642253	0.785882	0.0754353	0.0681944
	IL1R1	1	0.934653	1.06992	0.0699164	0.0653474		0.72358	0.626012	0.836355	0.112775	0.097568
	IGF2	1	0.94294	1.06051	0.0605123	0.0570595		0.779983	0.723409	0.84098	0.0609974	0.0565731
	EFNA1	1	0.919777	1.08722	0.0872204	0.0802233		0.797435	0.681157	0.933563	0.136128	0.116278
	FGF11	1	0.894579	1.11784	0.117844	0.105421		0.826075	0.764218	0.892939	0.066864	0.0618572
	OSMR	1	0.935609	1.06882	0.0688224	0.0643909		0.858468	0.724403	1.01734	0.158876	0.134065
	MERTK	1	0.936592	1.0677	0.0677006	0.0634078		0.863352	0.798008	0.934046	0.0706944	0.0653439
	PKM2	1	0.956857	1.04509	0.0450882	0.043143		0.88078	0.811047	0.956509	0.0757287	0.0697331
	LIFR	1	0.958095	1.04374	0.0437374	0.0419046		0.88803	0.825009	0.955866	0.067836	0.0630218
	ABL2	1	0.925132	1.08093	0.0809271	0.0748683		0.904328	0.839718	0.973909	0.0695813	0.0646099
	IGF1R	1	0.949056	1.05368	0.0536783	0.0509437		0.981201	0.87353	1.10214	0.120943	0.107671
	MAP3K3	1	0.9361	1.06826	0.0682615	0.0638996		0.990107	0.916466	1.06967	0.0795584	0.0736411
	NAMPT	1	0.914403	1.09361	0.0936095	0.0855968		1.03117	0.92032	1.15537	0.124199	0.110848
	IL28RA	1	0.864405	1.15687	0.156865	0.135595		1.13481	0.958697	1.34326	0.208459	0.176109
	DSTYK	1	0.939794	1.06406	0.064063	0.0602061		1.24501	1.09921	1.41016	0.165142	0.145802
	EPOR	1	0.927626	1.07802	0.0780207	0.072374		1.2726	1.11882	1.44753	0.174925	0.153787
	IL8	1	0.906403	1.10326	0.103261	0.0935965		2.75933	2.40058	3.17169	0.41236	0.358748
Note 1: The expression of indicated genes was presented as "fold" relative to the expression of GAPDH and normalized to the Normal liver group.
Note 2: Data presented are one experiment representative of two independent experiments (mean ± s.e.m. of technical triplicates).
